# 1        **Dysregulation of the Tweak/Fn14 pathway in skeletal muscle of spinal muscular atrophy mice**

2

3        Katharina E. Meijboom <sup>1,2</sup>, Emily McFall <sup>3</sup>, Daniel Anthony <sup>4</sup>, Benjamin Edwards <sup>1</sup>, Sabrina Kubinski <sup>5</sup>,

4        Gareth Hazell <sup>1</sup>, Nina Ahlskog <sup>1,7</sup>, Peter Claus <sup>5,6</sup>, Kay E. Davies <sup>1</sup>, Rashmi Kothary <sup>3</sup>, Matthew J.A. Wood

5        <sup>1,7</sup>, Melissa Bowerman <sup>1,8,9\*</sup>

6

7        <sup>1</sup> Department of Physiology, Anatomy and Genetics, University of Oxford, Oxford, United Kingdom

8        <sup>2</sup> Gene Therapy Center, UMass Medical School, Worcester, United States.

9        <sup>3</sup> Ottawa Hospital Research Institute, Regenerative Medicine Program, Ottawa, Canada and; Department of

10      Cellular and Molecular Medicine, University of Ottawa, Ottawa, Canada.

11      <sup>4</sup> Department of Pharmacology, University of Oxford, Oxford, United Kingdom.

12      <sup>5</sup> Institute of Neuroanatomy and Cell Biology, Hannover Medical School, Hannover, Germany and; Center  
13      for Systems Neuroscience, Hannover, Germany.

14      <sup>6</sup> SMATHERIA – Non-Profit Biomedical Research Institute, Hannover, Germany.

15      <sup>7</sup> Department of Paediatrics, University of Oxford, Oxford, United Kingdom.

16      <sup>8</sup> School of Medicine, Keele University, Staffordshire, United Kingdom.

17      <sup>9</sup> Wolfson Centre for Inherited Neuromuscular Disease, RJAH Orthopaedic Hospital, Oswestry, United  
18      Kingdom.

19

20      \* Corresponding author: m.bowerman@keele.ac.uk

21

## 22 ABSTRACT

23 Spinal muscular atrophy (SMA) is a childhood neuromuscular disorder caused by depletion of the survival  
24 motor neuron (SMN) protein. SMA is characterized by the selective death of spinal cord motor neurons,  
25 leading to progressive muscle wasting. Loss of skeletal muscle in SMA is a combination of denervation-  
26 induced muscle atrophy and intrinsic muscle pathologies. Elucidation of the pathways involved is essential  
27 to identify the key molecules that contribute to and sustain muscle pathology. The tumor necrosis factor-like  
28 weak inducer of apoptosis (TWEAK)/TNF receptor superfamily member fibroblast growth factor inducible  
29 14 (Fn14) pathway has been shown to play a critical role in the regulation of denervation-induced muscle  
30 atrophy as well as muscle proliferation, differentiation and metabolism in adults. However, it is not clear  
31 whether this pathway would be important in highly dynamic and developing muscle. We thus investigated  
32 the potential role of the TWEAK/Fn14 pathway in SMA muscle pathology, using the severe Taiwanese *Smn*<sup>-</sup>  
33 <sup>-</sup>; *SMN2* and the less severe *Smn*<sup>2B/-</sup> SMA mice, which undergo a progressive neuromuscular decline in the  
34 first three post-natal weeks. Here, we report significantly dysregulated expression of the TWEAK/Fn14  
35 pathway during disease progression in skeletal muscle of the two SMA mouse models. In addition, siRNA-  
36 mediated *Smn* knockdown in C2C12 myoblasts suggests a genetic interaction between *Smn* and the  
37 TWEAK/Fn14 pathway. Further analyses of SMA, *Tweak*<sup>-/-</sup> and *Fn14*<sup>-/-</sup> mice revealed dysregulated  
38 myopathy, myogenesis and glucose metabolism pathways as a common skeletal muscle feature, and  
39 providing further evidence in support of a relationship between the TWEAK/Fn14 pathway and *Smn*.  
40 Finally, a pharmacological intervention (Fc-TWEAK) to upregulate the activity of the TWEAK/Fn14  
41 pathway improved disease phenotypes in the two SMA mouse models. Our study provides novel mechanistic  
42 insights into the molecular players that contribute to muscle pathology in SMA and into the role of the  
43 TWEAK/Fn14 pathway in developing muscle.

44 **Keywords:** spinal muscular atrophy, survival motor neuron, *Smn*, *Tweak*, *Fn14*, glucose metabolism,  
45 skeletal muscle, atrophy, denervation

46

## 47 **BACKGROUND**

48 The neuromuscular disease spinal muscular atrophy (SMA) is the leading genetic cause of infant mortality  
49 [1]. SMA is caused by mutations in the *survival motor neuron 1 (SMN1)* gene [2]. The major pathological  
50 components of SMA pathogenesis are the selective loss of spinal cord alpha motor neurons and muscle  
51 wasting [3]. Skeletal muscle pathology is a clear contributor to SMA disease manifestation and progression  
52 and is caused by both denervation-induced muscle atrophy [4,5] and intrinsic defects [6–8]. As skeletal  
53 muscle is the largest insulin-sensitive tissue in the body and is involved in glucose utilization [9], it is not  
54 surprising that muscle metabolism is also affected in SMA. Impaired metabolism has indeed been reported  
55 in SMA Type 1, 2 and 3 patients [10–14]. A better understanding of the specific molecular effectors that  
56 contribute to SMA muscle physiopathology could provide mechanistic insights in SMA muscle pathology  
57 and help therapeutic endeavors aimed at improving muscle health in patients [15].

58  
59 One pathway that plays a crucial role in chronic injury and muscle diseases is the tumor necrosis factor-like  
60 weak inducer of apoptosis (TWEAK) and its main signaling receptor, the TNF receptor superfamily member  
61 fibroblast growth factor inducible 14 (Fn14) [16–18]. TWEAK is ubiquitously expressed and synthesized as  
62 a Type II transmembrane protein but can also be cleaved by proteolytic processing and secreted as a soluble  
63 cytokine [19]. The role of the TWEAK/Fn14 pathway in skeletal muscle is conflicting as it has been  
64 demonstrated to have both beneficial and detrimental effects on muscle health and function [20,21]. Indeed,  
65 pathologically high levels of TWEAK activate the canonical nuclear factor kappa-light-chain-enhancer of  
66 activated B cells (NF- $\kappa$ B) pathway, which promotes myoblast proliferation and thus inhibits myogenesis and  
67 the early phases of muscle repair and regeneration [22,23]. Conversely, lower physiological concentrations  
68 of TWEAK activate the non-canonical NF- $\kappa$ B pathway that promotes myoblast fusion and myogenesis [24].  
69 The transmembrane protein Fn14 is typically dormant or present in low levels in normal healthy muscle  
70 [25]. Atrophic inducing conditions (e.g. casting and surgical denervation) stimulate the expression of Fn14,  
71 leading to the chronic activation of the TWEAK/Fn14 pathway and sustained skeletal muscle atrophy [26].

72 We have also demonstrated an increased activity of the Tweak/Fn14 pathway in skeletal muscle of a mouse  
73 model of the neurodegenerative adult disorder amyotrophic lateral sclerosis (ALS), which is characterized  
74 by a progressive and chronic denervation-induced muscle atrophy [27]. In addition, various downstream  
75 effectors of the TWEAK/Fn14 pathway play critical roles in the regulation of muscle metabolism such as  
76 peroxisome proliferator-activated receptor-gamma coactivator 1 $\alpha$  (PGC-1 $\alpha$ ), glucose transporter 4 (Glut-4),  
77 myogenic transcription factor 2d (Mef2d), hexokinase II (HKII) and Krüppel-like factor 15 (Klf15) [28–34].  
78  
79 Although the TWEAK/Fn14 pathway has been ascribed roles in both skeletal muscle health regulation and  
80 metabolism, both of which are impacted in SMA [35,36], this pathway has yet to be investigated in the  
81 context of SMA. Furthermore, all research on this pathway has been performed in adult mice and therefore  
82 has never been explored in early phases of muscle development. We thus investigated the potential role of  
83 TWEAK/Fn14 signaling in SMA and in early phases of post-natal skeletal muscle development. We report  
84 significantly decreased levels of both *Tweak* and *Fn14* during disease progression in two distinct SMA  
85 mouse models (*Smn*<sup>-/-</sup>; *SMN2* and *Smn*<sup>2B/-</sup>) [37,38]. We also observed dysregulated expression of *PGC-1 $\alpha$* ,  
86 *Glut-4*, *Mef2d* and *HKII*, the metabolic downstream effectors of TWEAK/Fn14 signaling [29,30], in skeletal  
87 muscle of these SMA mice. In addition, more in-depth analyses revealed an overlap of aberrantly expressed  
88 genes that regulate myopathy, myogenesis and glucose metabolism pathways in skeletal muscle of SMA,  
89 *Tweak*<sup>-/-</sup> and *Fn14*<sup>-/-</sup> mice, further supporting shared functions between the TWEAK/Fn14 pathway and SMN  
90 in developing muscle. Finally, upregulation of the activity of the TWEAK/Fn14 pathway, through a  
91 pharmacological intervention (Fc-TWEAK administration), improved disease phenotypes in the two SMA  
92 mouse models. Our study uncovers novel mechanistic insights into the molecular effectors that contribute to  
93 skeletal muscle pathology in SMA and demonstrates a role for the TWEAK/Fn14 pathway in the early stages  
94 of post-natal muscle development.

95

96

## 97 **METHODS**

### 98 Animals and animal procedures

99 Wild-type mice FVB/N [39] and C57BL/6J [40] and the severe *Smn*<sup>-/-</sup>;*SMN2* mouse model (FVB.Cg-  
100 *Smn1tm1Hung Tg(SMN2)2Hung/J*) [41] were obtained from Jackson Laboratories. The *Smn*<sup>2B/-</sup> mouse  
101 model [38,42] was kindly provided by Dr. Lyndsay M Murray (University of Edinburgh). *Tweak*<sup>-/-</sup> [43] and  
102 *Fn14*<sup>-/-</sup> mouse models [44] were generously obtained from Linda C. Burkly (Biogen).

103 Most experiments with live animals were performed at the Biomedical Services Building, University of  
104 Oxford. Experimental procedures were authorized and approved by the University of Oxford ethics  
105 committee and UK Home Office (current project license PDFEDC6F0, previous project license 30/2907) in  
106 accordance with the Animals (Scientific Procedures) Act 1986. Experiments with the *Smn*<sup>2B/-</sup> mice in Figure  
107 1 were performed at the University of Ottawa Animal Facility according to procedures authorized by the  
108 Canadian Council on Animal Care.

109 Fc-TWEAK was administered by subcutaneous injections using a sterile 0.1 cc insulin syringe at various  
110 doses (7.9 µg, 15.8 µg or 31.6 µg) and at a volume of 20 µl either daily, every other day or every four days.  
111 Mouse Fc-TWEAK, a fusion protein with the murine IgG2a Fc region, and Ig isotope control were kindly  
112 provided by Linda C. Burkly (Biogen) [43].

113 For survival studies, mice were weighed and monitored daily and culled upon reaching their defined humane  
114 endpoint.

115 For all experiments, litters were randomly assigned at birth and whole litters composed of both sexes were  
116 used. Sample sizes were determined based on similar studies with SMA mice.

117 To reduce the total number of mice used, the fast-twitch tibialis anterior (TA) and triceps muscles from the  
118 same mice were used interchangeably for respective molecular and histological analyses.

119

120

121

122 Sciatic nerve crush

123 For nerve crush experiments, post-natal day (P) 7 wild-type (WT) FVB/N mice [39] were anesthetized with  
124 2% isoflurane/oxygen before one of their lateral thighs was shaved and a 1 cm incision in the skin was made  
125 over the lateral femur. The muscle layers were split with blunt scissors, the sciatic nerve localized and  
126 crushed with tweezers for 15 seconds. The skin incision was closed with surgical glue and animals allowed  
127 to recover on a warming blanket. Ipsilateral and contralateral TA muscles were harvested at P14 and either  
128 fixed in 4% paraformaldehyde (PFA) for 24 hours for histological analyses or snap frozen for molecular  
129 analyses.

130

131 Cardiotoxin injections

132 Cardiotoxin  $\gamma$  (Cytotoxin I, Latoxan, L8102, Portes les Valence) was dissolved in 0.9% saline and injected  
133 4  $\mu$ l/g per total mouse weight of a 10  $\mu$ M solution into the left TA muscle of WT FVB/N mice [39] at post-  
134 natal day (P) 10. The right TA was injected with equal volumes of 0.9% saline. During the injection, mice  
135 were anesthetized with 2% isoflurane/oxygen and all injections were done using a sterile 0.3 cc insulin  
136 syringe. TA muscles were harvested 6 days later and either fixed in 4% PFA for 24 hours for histological  
137 analyses or snap frozen for molecular analyses.

138

139 Laminin staining of skeletal muscle

140 TA muscles were fixed in PFA overnight. Tissues were sectioned (13  $\mu$ m) and incubated in blocking buffer  
141 for 2 hours (0.3% Triton-X, 20% fetal bovine serum (FBS) and 20% normal goat serum in PBS). After  
142 blocking, tissues were stained overnight at 4°C with rat anti-laminin (1:1000, Sigma L0663) in blocking  
143 buffer. The next day, tissues were washed in PBS and probed using a goat-anti-rat IgG 488 secondary  
144 antibody (1:500, Invitrogen A-11006) for one hour. PBS-washed tissues were mounted in Fluoromount-G  
145 (Southern Biotech). Images were taken with a DM IRB microscope (Leica) with a 20X objective.  
146 Quantitative assays were performed blinded on 3-5 mice for each group and five sections per mouse. The

147 area of muscle fiber within designated regions of the TA muscle sections was measured using Fiji (ImageJ)  
148 [45].

149

#### 150 Hematoxylin and eosin staining of skeletal muscle

151 TA muscles were fixated in 4% PFA and imbedded into paraffin blocks. For staining, muscles were sectioned  
152 (13  $\mu$ m) and deparaffinized in xylene and then fixed in 100% ethanol. Following a rinse in water, samples  
153 were stained in hematoxylin (Fisher) for 3 minutes, rinsed in water, dipped 40 times in a solution of 0.02%  
154 HCl in 70% ethanol and rinsed in water again. The sections were next stained in a 1% eosin solution (BDH)  
155 for 1 minute, dehydrated in ethanol, cleared in xylene, and mounted with Fluoromount-G (Southern Biotech).  
156 Images were taken with a DM IRB microscope (Leica) with a 20X objective. Quantitative assays were  
157 performed blinded on 3-5 mice for each group and five sections per mouse. The area of muscle fibre within  
158 designated regions of the TA muscle sections was measured using Fiji (ImageJ) [45].

159

#### 160 Cell culture

161 Both C2C12 myoblasts [46] and NSC-34 neuronal-like cells [47] were maintained in growth media  
162 consisting of Dulbecco's Modified Eagle's Media (DMEM) supplemented with 10% FBS and 1%  
163 Penicillin/Streptomycin (all Life Technologies). Cells were cultured at 37°C with 5% CO<sub>2</sub>. C2C12 myoblasts  
164 were differentiated in DMEM containing 2% horse serum for 7 days to form multinucleated myotubes.  
165 Cells were regularly tested for mycoplasma and remained mycoplasma-free.

166

#### 167 In vitro siRNA knockdown

168 For small interfering RNA (siRNA) transfections, C2C12 myoblasts were seeded onto 12-well plates at a  
169 50% confluency and cultured overnight in 2 mL of DMEM. Cells were washed with PBS prior to siRNA  
170 transfection, whereby 100 pmol of each siRNA (*Tweak*, *Fn14*, *Smn*) (Invitrogen, assay IDs s233937,  
171 s203164, s74017, respectively) in a complex with 10  $\mu$ l of Lipofectamine RNAi/MAX (Invitrogen) dissolved

172 in OptiMEM solution (Gibco) was added to the cells for three hours. The transfection mix was then  
173 substituted either for DMEM without the siRNAs for 1 day or with a differentiation medium mix without  
174 the siRNAs for 7 days.

175

#### 176 qPCR

177 RNA was extracted from tissues and cells either by a RNeasy kit from Qiagen or by guanidinium  
178 thiocyanate-acid-phenol-chloroform extraction using TRIzol Reagent (Life Technologies) as per  
179 manufacturer's instructions. The same RNA extraction method was employed for similar experiments and  
180 equal RNA amounts were used between samples within the same experiments. cDNA was prepared with the  
181 High Capacity cDNA Kit (Life Technologies) according to the manufacturer's instructions. The cDNA  
182 template was amplified on a StepOnePlus Real-Time PCR Thermocycler (Life Technologies) with SYBR  
183 Green Mastermix from Applied Biosystems. qPCR data was analyzed using the StepOne Software v2.3  
184 (Applied Biosystems). Primers used for qPCR were obtained from IDT and sequences for primers were  
185 either self-designed or ready-made (Supplementary Table 1). Relative gene expression was quantified using  
186 the Pfaffl method [48] and primer efficiencies were calculated with the LinRegPCR software. We  
187 normalized relative expression level of all tested genes in mouse tissue and cells to *RNA polymerase II*  
188 *polypeptide J (PolJ)* [49].

189

#### 190 PCR array

191 RNA was extracted using the RNeasy® Microarray Tissue Kit (Qiagen). cDNA was generated with the RT<sup>2</sup>  
192 First Strand Kit (Qiagen). qPCRs were performed using RT<sup>2</sup> Profiler™ PCR Array Mouse Skeletal Muscle:  
193 Myogenesis & Myopathy Mouse (PAMM-099Z, SABiosciences) and RT<sup>2</sup> Profiler™ PCR Array Mouse  
194 Glucose Metabolism (PAMM-006Z SABiosciences). The data were analyzed with RT Profiler PCR Array  
195 Data Analysis (version 3.5) and mRNA expression was normalized to the two most stably expressed genes  
196 between all samples. We used the publicly available database STRING (version 10.5) for network and



197 enrichment analysis of differently expressed genes [50]. The minimum required interaction score was set at  
198 0.4, medium confidence.

199

## 200 Western blot

201 Freshly prepared radioimmunoprecipitation (RIPA) buffer was used to homogenize tissue and cells,  
202 consisting of 50 mM Tris pH 8.8, 150mM NaCl, 1% NP-40, 0.5% sodium deoxycholate, 0.1% SDS and  
203 complete mini-proteinase inhibitors (Roche). Equal amounts of total protein were loaded, as measured by  
204 Bradford Assay. Protein samples were first diluted 1:1 with Laemmli sample buffer (Bio-Rad, Hemel  
205 Hempstead, UK) containing 5%  $\beta$ -mercaptoethanol (Sigma) and heated at 100°C for 10 minutes. Next,  
206 samples were loaded on freshly made 1.5 mm 12% polyacrylamide separating and 5% stacking gel and  
207 electrophoresis was performed at 120 V for ~1.5 hours in running buffer. Subsequently, proteins were  
208 transferred from the gel onto to a polyvinylidene fluoride membrane (Merck Millipore) via electroblotting  
209 at 120 V for 60 minutes in transfer buffer containing 20% methanol. Membranes were then incubated for 2  
210 hours in Odyssey Blocking Buffer (Licor). The membrane was then probed overnight at 4°C with primary  
211 antibodies (P105/p50, 1:1000, Abcam ab32360; Actin, 1:1000, Abcam ab3280) in Odyssey Blocking Buffer  
212 and 0.1% Tween-20. The next day, after three 10-minute washing steps with PBS, the membrane was  
213 incubated for 1 hour at room temperature with secondary antibodies (goat anti-rabbit IgG 680RD, 1:1000,  
214 LI-COR 926-68071; goat anti-mouse IgG 800CW, 1:1000 LI-COR, 926-32210). Lastly, the membrane was  
215 washed three times for 10 minutes in PBS and visualized by scanning 700 nm and 800 nm channels on the  
216 LI-COR Odyssey CLx infrared imaging system (LI-COR) for 2.5 minutes per channel. The background was  
217 subtracted and signal of protein of interest was divided by signal of the housekeeping protein.

218

## 219 Statistical Analysis

220 All statistical analyses were done with the most up to date GraphPad Prism software. When appropriate, a  
221 Student's unpaired two-tail *t*-test, a one-way ANOVA or a two-way ANOVA was used. *Post-hoc* analyses

222 used are specified in Figure Legends. Outliers were identified via the Grubbs' test. For the Kaplan-Meier  
223 survival analysis, the log-rank test was used and survival curves were considered significantly different at  
224  $p < 0.05$ .

225

226

227

228

229

230

231

232

233

234

235

236

237

238

239

240

241 **RESULTS**

242 **The TWEAK/Fn14 pathway is dysregulated in two SMA mouse models**

243 We firstly investigated the expression of the TWEAK/Fn14 pathway in skeletal muscle of the severe  
244 Taiwanese *Smn*<sup>-/-</sup>;*SMN2* mouse model [37], using muscles with reported differential vulnerability to  
245 neuromuscular junction (NMJ) denervation (vulnerability: triceps brachii > gastrocnemius > TA >  
246 quadriceps femoris) [51]. Muscles were harvested from *Smn*<sup>-/-</sup>;*SMN2* and WT mice at several time points  
247 during disease progression: birth (post-natal day (P) 0, pre-symptomatic (P2), early symptomatic (P5), late-  
248 symptomatic (P7) and end stage (P10)).

249  
250 We assessed the expression of *parvalbumin*, a high affinity Ca<sup>2+</sup>-binding protein, which is downregulated in  
251 denervated muscle [52,53] and a marker of muscle atrophy in skeletal muscle of SMA patients and  
252 *Smn*<sup>-/-</sup>;*SMN2* mice [54]. We observed a significant decreased expression of *parvalbumin* mRNA during  
253 disease progression (Fig. 1a) in SMA mice compared to WT animals, further confirming parvalbumin as a  
254 *bona fide* marker of muscle atrophy in SMA [54]. Furthermore, we noted that parvalbumin expression was  
255 downregulated at earlier time points in the two most vulnerable muscles (triceps and gastrocnemius) [51] of  
256 SMA mice compared to WT animals (Fig. 1a).

257  
258 We next evaluated the expression of *Tweak* and *Fn14* and observed significant decreased levels of *Tweak*  
259 mRNA in muscles of *Smn*<sup>-/-</sup>;*SMN2* mice during disease progression, except in the quadriceps (Fig. 1b), in  
260 accordance with it being a relatively invulnerable SMA muscle [51]. Similarly, we found significantly lower  
261 levels of *Fn14* mRNA in all muscles of *Smn*<sup>-/-</sup>;*SMN2* mice during disease progression (Fig. 1c) compared to  
262 WT animals. Interestingly, the decreased expression of *Fn14* in denervated and atrophied muscles of  
263 neonatal animals is different to previous reports in adults where denervation-induced atrophy stimulates its  
264 expression [26,27].

265

266 As mentioned above, the TWEAK/Fn14 pathway has been reported to negatively regulate the expression of  
267 metabolic effectors *Klf15*, *Pgc-1 $\alpha$* , *Mef2d*, *Glut-4* and *HKII* [29]. Given that we have previously published  
268 a concordant increased expression of *Klf15* in skeletal muscle of SMA mice during disease progression [55],  
269 we next evaluated if the additional downstream metabolic targets were similarly dysregulated in the  
270 predicted directions. We indeed observed that the mRNA expression of *Pgc-1 $\alpha$* , *Mef2d*, *Glut-4* and *HKII*  
271 was significantly upregulated in muscles of *Smn*<sup>-/-</sup>;*SMN2* mice at symptomatic time-points (P5-P10)  
272 compared to WT animals (Fig. 1d-g), showing an expected opposite pattern to both *Tweak* and *Fn14* (Fig.  
273 1b-c) [29]. Notably, we also found that in most muscles, mRNA levels of *Pgc-1 $\alpha$* , *Mef2d*, *Glut4* and *HKII*  
274 were significantly decreased in pre-symptomatic *Smn*<sup>-/-</sup>;*SMN2* mice (P0-P5) compared to WT animals (Fig.  
275 1d-g), independently of *Tweak* and *Fn14* (Fig. 1b-c).

276  
277 TWEAK/Fn14 pathway also regulates the canonical and non-canonical NF- $\kappa$ B pathways in skeletal muscle  
278 [56,57]. In pre-symptomatic (P2) TA muscle, we observed no significant difference in the expression of NF-  
279  $\kappa$ B1 (p50), a component of the canonical NF- $\kappa$ B pathway, between *Smn*<sup>-/-</sup>;*SMN2* mice and WT animals (Fig.  
280 1h), consistent with normal *Tweak* and *Fn14* levels (Fig. 1b-c). Conversely, there was a significant decreased  
281 expression of NF- $\kappa$ B1 (p50) in TA muscle of symptomatic *Smn*<sup>-/-</sup>;*SMN2* mice compared to WT animals at  
282 P7 (Fig. 1i), in line with reduced levels of *Tweak* and *Fn14* (Fig. 1b). We also investigated the expression of  
283 NF- $\kappa$ B-inducing kinase (NIK), involved in the non-canonical NF- $\kappa$ B activation pathway [58]. We observed  
284 that mRNA levels of NIK were significantly increased in TA muscle of P7 *Smn*<sup>-/-</sup>;*SMN2* mice compared to  
285 WT animals (Fig. 1j), suggesting that dysregulated activity of the Tweak/Fn14 in skeletal muscle of SMA  
286 mice impacts both the canonical and non-canonical NF- $\kappa$ B pathways, which play key regulatory roles in  
287 muscle health and metabolism [20,21].

288  
289 Finally, we evaluated the expression of the TWEAK/Fn14 signaling cascade in skeletal muscle of the less  
290 severe *Smn*<sup>2B/-</sup> mouse model of SMA [38]. TA muscles were harvested from *Smn*<sup>2B/-</sup> mice and age-matched

291 WT animals at P0 (birth), P2 (early pre-symptomatic), P4 (late pre-symptomatic), P11 (early symptomatic)  
292 and P19 (end stage). We found a significant decreased expression of *parvalbumin* (Fig. 1k), *Tweak* (Fig. 1l)  
293 and *Fn14* (Fig. 1m) in muscle from *Smn*<sup>2B/-</sup> mice during disease progression compared to WT animals,  
294 similar to that observed in the more severe *Smn*<sup>-/-</sup>; *SMN2* SMA mouse model (Fig. 1a-c). We have previously  
295 reported the aberrant increased expression of *Klf15* in the TA muscle of *Smn*<sup>2B/-</sup> mice during disease  
296 progression [55]. However, we did not observe an increase in expression of *Pgc-1α* (Fig. 1n), *Mef2d* (Fig.  
297 1o), *Glut-4* (Fig 1p) and *HKII* (Fig. 1q), suggesting that the negative regulation of these downstream  
298 metabolic effectors may be dependent on disease severity, age and/or genetic strain.

299  
300 We have thus demonstrated that the TWEAK/Fn14 pathway is dysregulated during progressive muscle  
301 atrophy in two SMA mouse models.

302  
303 **Denervation does not affect the Tweak/Fn14 pathway during the early stages of muscle development**

304 As SMA muscle pathology is defined by both intrinsic defects and denervation-induced events, we set out  
305 to determine which of these may influence the dysregulation of the Tweak/Fn14 pathway in SMA muscle.  
306 We firstly addressed the denervation component by performing nerve crush experiments in which the sciatic  
307 nerves of P7 WT mice were crushed and the muscle harvested at P14 [59]. Of note, the sciatic nerve was  
308 crushed in only one hindlimb, leaving the other control hindlimb intact. Quantification of myofiber area in  
309 TA muscles showed a significant decrease in myofiber size in the nerve crush muscle compared to the control  
310 hindlimb (Fig. 2a-c).

311  
312 Expression analyses further revealed that there were no significant changes in mRNA levels of *parvalbumin*,  
313 *Tweak*, *Fn14*, *PGC-1α*, *Mef2d*, *Glut-4* and *HKII* in the denervated muscle compared to the control TA  
314 muscle (Fig. 2d). Interestingly, while denervation in adult muscle induces a dramatic surge in Fn14  
315 expression [26,27], this did not occur in the denervated muscles of our pre-weaned mice, suggesting an age

316 and/or development regulatory element to this response. We also investigated the expression of *Klf15* and  
317 *Smn* and similarly observed no significant differences between the nerve crush and control muscles (Fig.  
318 2d).

319  
320 Overall, these results suggest that the dysregulation of parvalbumin and the Tweak/Fn14 pathway in SMA  
321 muscle during disease progression is most likely not denervation-dependent.

322  
323 **Intrinsic muscle injury affects the Tweak/Fn14 pathway during the early stages of muscle**  
324 **development**

325 We next investigated what impact impairing intrinsic muscle integrity would have on the Tweak/Fn14  
326 pathway. To do so, we used cardiotoxin to induce myofiber necrosis. Cardiotoxin was injected in P10 WT  
327 mice into the left TA while the right TA was injected with equal volumes of 0.9% saline and used as a control  
328 [60]. TAs were harvested after 6 days, a time-point where muscles are still in an immature and regenerating  
329 mode [61]. Indeed, analysis of centrally located nuclei showed a significantly increased percentage of  
330 regenerating myofibers in cardiotoxin-treated muscles compared to saline-treated TAs (Fig. 3a-b).

331  
332 We then proceeded with molecular analyses and observed that the atrophy marker *parvalbumin* was  
333 significantly downregulated in cardiotoxin-treated TA muscles compared to saline-treated TA muscles (Fig.  
334 3c). *Fn14* mRNA expression was significantly increased after cardiotoxin injury, in accordance with  
335 previous research showing that muscle damage conditions activate Fn14 [26]. Conversely, *Pgc-1 $\alpha$* , *Glut-4*,  
336 *HKII* and *Klf15* mRNA levels were significantly downregulated (Fig. 3c), supporting their reported negative  
337 regulation by the Tweak/Fn14 pathway [29]. Interestingly, *Tweak* mRNA expression remained unchanged,  
338 contrary to reports of upregulation following cardiotoxin injury in adult muscle [62], suggesting a differential  
339 response in early developmental stages of skeletal muscle. Notably, *Smn* expression was significantly

340 increased in the regenerating muscles compared to saline-treated TA muscles (Fig. 3c), perhaps due to  
341 SMN's role during muscle fiber regeneration [63].

342

343 Together, these results demonstrate that intrinsic muscle injury in pre-weaned mice induces a dysregulation  
344 of the Tweak/Fn14 signaling cascade. However, the changes were in the opposite direction than that  
345 observed in SMA muscles (Fig. 1b), perhaps due to the necrosis and regeneration events that occur following  
346 cardiotoxin injury [64], which are not typically found in muscles of SMA mice.

347

### 348 **Genetic interactions between *Smn*, *Tweak* and *Fn14* in muscle**

349 We next wanted to further understand the potential relationship between dysregulated expression of *Tweak*,  
350 *Fn14* and *Smn* in skeletal muscle of SMA mice. To do so, we evaluated the impact of Tweak and Fn14  
351 depletion in the early stages of muscle development by performing molecular analyses on P7 triceps from  
352 *Fn14*<sup>-/-</sup> [44], *Tweak*<sup>-/-</sup> [43] and WT mice. In *Tweak*<sup>-/-</sup> mice, we observed a significant increased expression  
353 of *Fn14* with a concomitant significantly decreased expression of *Klf15* compared to WT animals (Fig. 4a).  
354 Notably, we found a significant decreased expression of *Smn* in *Tweak*<sup>-/-</sup> triceps compared to WT mice (Fig.  
355 4a), suggesting a direct or indirect positive interaction between Tweak and Smn levels. For their part,  
356 *Fn14*<sup>-/-</sup> mice displayed a significant downregulation of *parvalbumin* and a significant upregulation of *Pgc-*  
357 *1α* (Fig. 4b). These analyses further validate the reported negative regulation of Pgc-1α and Klf15 by Fn14  
358 and support the absence of overt pathological muscle phenotypes in young *Tweak*<sup>-/-</sup> and *Fn14*<sup>-/-</sup> mice [26,65].

359

360 To further dissect the relationship between Smn and the Tweak/Fn14 pathway during myogenic  
361 differentiation, we performed siRNA-mediated knockdown of *Smn*, *Tweak* and *Fn14* in C2C12 myoblasts  
362 and evaluated the effect on the Tweak/Fn14 signaling in undifferentiated (Day 0) and differentiated (Day 7)  
363 cells. Reduced levels of *Smn*, *Tweak* and *Fn14* were significantly maintained in both proliferating and  
364 differentiated cells following transfection with *siSmn*, *siTweak* and *siFn14*, respectively (Fig. 4c-e). We

365 observed an interaction between *Smn*, *Tweak* and *Fnl4* specifically in differentiated C2C12s, whereby *Smn*  
366 expression was significantly upregulated in *Fnl4*-depleted D7 cells (Fig. 4c), *Tweak* expression was  
367 significantly reduced in *Smn*-depleted D7 cells (Fig. 4d), and *Fnl4* levels were significantly decreased in  
368 *Tweak*- and *Smn*-depleted D7 cells (Fig. 4e). Similarly, the effects of siRNA-mediated knockdown of *Smn*,  
369 *Tweak* and *Fnl4* on downstream metabolic effectors were only apparent in differentiated C2C12s (Fig. 4f-  
370 j). Indeed, both knockdown of *Tweak* and *Fnl4* resulted in a significant upregulation of *Pgc-1 $\alpha$*  (Fig. 4f) and  
371 *Mef2d* (Fig. 4g). While *Glut-4* expression was neither affected by depletion of *Smn*, *Tweak* or *Fnl4* (Fig.  
372 4h), *HKII* mRNA levels were significantly decreased following knockdown of all three (Fig. 4i). Finally,  
373 *Klf15* expression was significantly increased in siRNA-mediated knockdown of *Fnl4* only (Fig. 4j). The  
374 upregulation of *Pgc-1 $\alpha$* , *Mef2d*, and *Klf15* in *Tweak*- and/or *Fnl4*-depleted differentiated C2C12 cells is in  
375 accordance with the previously reported negative regulation of these genes by the Tweak/Fn14 pathway  
376 while the unchanged *Glut-4* and downregulated *HKII* levels were not [18].

377

378 Thus, using both *in vivo* and *in vitro* models, we have thus provided evidence for a potential interaction  
379 between *Smn*, *Tweak* and *Fnl4* and subsequent impact on the Tweak/Fn14 signaling cascade (Fig. 4k). Our  
380 results suggest that the aberrant expression of the Tweak/Fn14 pathway in SMA muscle during disease  
381 progression may be due to a dynamic interplay between atrophic conditions and the molecular impact,  
382 individual and combined, of reduced expression of *Smn*, *Tweak* and *Fnl4* in the early developmental stages  
383 of skeletal muscle.

384

### 385 **Overlap of dysregulated myopathy and myogenesis genes and glucose metabolism genes in SMA,** 386 ***Fnl4*<sup>-/-</sup> and *Tweak*<sup>-/-</sup> mice**

387 To further decipher the potential contribution(s) of *Smn*, *Tweak* and *Fnl4* depletion to SMA muscle  
388 pathology, we used commercially available mouse myopathy and myogenesis qPCR arrays  
389 (SABiosciences), which measure expression levels of a subset of 84 genes known to display and/or regulate



390 myopathy and myogenesis. We used triceps (vulnerable) and quadriceps (resistant) from P7 *Smn*<sup>-/-</sup>;*SMN2*,  
391 *Tweak*<sup>-/-</sup>, *Fn14*<sup>-/-</sup> mice. WT FVB/N mice were compared to SMA animals and WT C57BL/6 mice were  
392 compared to *Tweak*<sup>-/-</sup> and *Fn14*<sup>-/-</sup> mice to account for differences due to genetic strains. Unsurprisingly, we  
393 observed a larger number of significantly dysregulated myopathy and myogenesis genes in triceps of  
394 *Smn*<sup>-/-</sup>;*SMN2* mice than in the more resistant quadriceps, some of which overlapped with the subset of genes  
395 aberrantly expressed in *Fn14*<sup>-/-</sup> mice and *Tweak*<sup>-/-</sup> mice (Fig. 5a, Table 1, Supplementary File 1). We also  
396 used the publicly available database STRING [50] to perform network and enrichment analysis of the shared  
397 differently expressed genes in both triceps and quadriceps (Table 1), which revealed that there were no  
398 known protein-protein interactions between any of the dysregulated genes and *Smn*, *Fn14* or *Tweak* (Fig.  
399 5b). Interestingly, the central connectors *Myod1* and *Myf6* were upregulated and *Pax7* was downregulated  
400 in the triceps of all three experimental groups (Table 1). *Myod1* and *Myf6* are key myogenic regulatory  
401 factors (MRFs) and are normally upregulated after skeletal muscle injury [66]. *Pax7* is a canonical marker  
402 for satellite cells, the resident skeletal muscle stem cells [66], and reduced activity of *Pax7* leads to cell-  
403 cycle arrest of satellite cells and dysregulation of MRFs in skeletal muscle [67]. Furthermore, *Titin* (*Ttn*)  
404 was downregulated in the quadriceps muscles of all three mouse models and plays major roles in muscle  
405 contraction and force production, highlighted by titin mutations leading to a range of skeletal muscle diseases  
406 and phenotypes [68].

407

408 Next, as both SMA and the *Tweak*/*Fn14* pathway have both been associated with glucose metabolism  
409 abnormalities [29,69], we performed similar gene expression analyses with commercially available qPCR  
410 arrays (SABiosciences) containing a subset of 84 genes known to display and/or regulate glucose  
411 metabolism. We found a similar large number of genes that were dysregulated in both triceps and quadriceps  
412 muscles of *Smn*<sup>-/-</sup>;*SMN2* mice, some of which overlapped with those differentially expressed in *Fn14*<sup>-/-</sup> and  
413 *Tweak*<sup>-/-</sup> mice (Fig. 5c, Table 2, Supplementary File 2). STRING network and enrichment analysis [50]  
414 revealed that there are no known protein-protein interactions between any of the dysregulated genes and

415 Smn, Fn14 or Tweak. Further analysis of Kyoto Encyclopedia of Genes and Genomes (KEGG) pathways  
416 composed of the glucose metabolism genes significantly dysregulated in the same direction in triceps and  
417 quadriceps muscles of P7 *Smn*<sup>-/-</sup>; *SMN2*, *Fn14*<sup>-/-</sup> and *Tweak*<sup>-/-</sup> mice as well as the downstream effectors of the  
418 TWEAK/Fn14 pathway studied in this project (*Pgc-1α*, *Mef2d*, *Glut4*, *Klf15*, and *HKII*) reveals that many  
419 aspects of glucose metabolism, such as insulin signaling, glycolysis are dysregulated in *Smn*<sup>-/-</sup>, *Tweak*<sup>-/-</sup> and  
420 *Fn14*-depleted mice (Table 3).

421  
422 We thus show a shared pattern of aberrantly expressed genes that modulate myogenesis, myopathy and  
423 glucose metabolism in SMA, *Tweak*-depleted and *Fn14*-depleted skeletal muscle, suggesting that *Smn* and  
424 the *Tweak*/*Fn14* pathway may act synergistically on muscle pathology and metabolism defects in SMA  
425 muscle.

#### 427 **Increasing Tweak activity improves a subset of disease phenotypes in two SMA mouse models**

428 Finally, we evaluated the impact of activating the *Tweak*/*Fn14* pathway on disease progression and muscle  
429 pathology in SMA mice. To do so, *Smn*<sup>-/-</sup>; *SMN2* mice and healthy littermates received a daily subcutaneous  
430 injection of Fc-TWEAK (15.8 μg), a fusion protein with the murine IgG2a Fc region [43], starting at birth.  
431 We found that Fc-TWEAK did not significantly impact weight or survival of *Smn*<sup>-/-</sup>; *SMN2* mice compared  
432 to untreated and IgG-treated controls (Fig. 6a-b). Additional lower (7.9 μg) and higher doses (23 and 31.6  
433 μg) were also administered but proved to negatively impact weight and survival (Supplementary Fig. 1).

434  
435 Triceps from P7 untreated and Fc-TWEAK-treated (15.8 μg) *Smn*<sup>-/-</sup>; *SMN2* SMA mice and *Smn*<sup>+/-</sup>; *SMN2*  
436 healthy littermates were further processed for molecular analyses of the *Tweak*/*Fn14* pathway. We observed  
437 that Fc-TWEAK administration did not influence the expression of *Tweak* (Fig. 6c) or *Fn14* (Fig. 6d) in  
438 neither *Smn*<sup>+/-</sup>; *SMN2* nor *Smn*<sup>-/-</sup>; *SMN2* mice compared to untreated animals. Accordingly, Fc-TWEAK did  
439 not induce changes in *Pgc-1α* expression (Fig. 6e). We did observe a significant downregulation of *Mef2d*

440 in Fc-TWEAK-treated muscles of *Smn*<sup>-/-</sup>;*SMN2* SMA mice compared to untreated animals (Fig. 6f). *Glut-4*  
441 mRNA expression remained unchanged in both *Smn*<sup>+/-</sup>;*SMN2* and *Smn*<sup>-/-</sup>;*SMN2* Fc-TWEAK-treated mice  
442 (Fig. 6g). *HKII* was significantly upregulated in muscle of Fc-TWEAK-treated *Smn*<sup>+/-</sup>;*SMN2* healthy  
443 littermates while it was significantly downregulated in Fc-TWEAK-treated *Smn*<sup>-/-</sup>;*SMN2* SMA mice  
444 compared to untreated groups (Fig. 6h). *Klf15* was significantly downregulated in Fc-treated *Smn*<sup>-/-</sup>;*SMN2*  
445 SMA only compared to untreated SMA animals (Fig. 6i). The absence of overt changes in the expression of  
446 Tweak, Fn14 and downstream metabolic effectors may be due to the 24 hour time-lapse between the last Fc-  
447 Tweak injection and harvest of tissues, which could have led to missing key time-points at which  
448 transcriptional profiles were significantly impacted.

449  
450 Whilst we did not capture the short-term molecular effects of Fc-TWEAK administration, quantification of  
451 myofiber area in TA muscles showed that daily Fc-TWEAK treatment significantly increased myofiber area  
452 in skeletal muscle of P7 *Smn*<sup>-/-</sup>;*SMN2* mice compared to untreated SMA animals (Fig. 6j-l). Furthermore, the  
453 expression of atrophy markers *parvalbumin*, *MuRF-1* and *atrogin-1* [70] was also restored towards normal  
454 levels, whereby *parvalbumin* expression was significantly increased (Fig. 6m) whilst *MuRF-1* and *atrogin-*  
455 *1* expression was significantly downregulated (Fig. 6n-o) in triceps of Fc-TWEAK-treated *Smn*<sup>-/-</sup>;*SMN2*  
456 SMA mice compared to untreated SMA animals, further supporting an improvement in muscle health. We  
457 did not however detect changes in MRFs *Myod1* and *myogenin* [66] (Fig. 6p-r).

458  
459 We next assessed the effect of Fc-TWEAK in *Smn*<sup>2B/-</sup> mice, which are typically more responsive to *Smn*-  
460 independent treatment strategies [55,71–73]. Due to the longer treatment period in these mice (20 days) and  
461 the observed toxicity in daily injected mice (> 10 days), the *Smn*<sup>2B/-</sup> and *Smn*<sup>2B/+</sup> mice received subcutaneous  
462 injections of Fc-TWEAK and IgG control (15.8 µg) every 4 days, starting at birth. Both IgG and Fc-TWEAK  
463 did not significantly impact the weight of *Smn*<sup>2B/-</sup> mice compared to untreated SMA animals (Fig. 6s).  
464 However, Fc-TWEAK significantly increased the lifespan of *Smn*<sup>2B/-</sup> mice compared to both IgG-treated

465 and untreated animals (Fig. 6t). Molecular analyses of triceps from P15 animals only showed a significant  
466 effect of Fc-TWEAK on the expression of *Glut-4*, whereby it was downregulated in Fc-TWEAK-treated  
467 *Smn<sup>2B/-</sup>* mice compared to untreated animals (Fig. 6u). Similarly to above, the limited impact of Fc-TWEAK  
468 on the expression of the Tweak/Fn14 signaling cascade is most likely due to the 72-hour time-lapse between  
469 the last injection of Fc-Tweak and tissue harvest.

470

471 Taken together, our results demonstrate that increasing Tweak activity in SMA mice has the potential to  
472 improve weight, survival, and muscle pathology, suggesting that restoring the Tweak/Fn14 pathway in SMA  
473 muscle may lead to sustainable therapeutic benefits.

474

475

476

477

478

479

480

481

482

483

484

485

486

487

488

489

490

## 491 **DISCUSSION**

492 Motor neuron death and muscle pathology bi-directionally impact on each other in SMA. Indeed, while loss  
493 of motor neurons significantly contributes to muscle atrophy, there is also evidence for muscle-intrinsic  
494 abnormalities in SMA skeletal muscle, which could be directly or indirectly caused by SMN deficiency [6–  
495 8,74,75]. In this study, we addressed the underlying mechanisms of muscle-intrinsic abnormalities leading  
496 to muscle pathology in SMA by investigating the role of the TWEAK/Fn14 pathway in muscle atrophy in  
497 SMA. To the best of our knowledge, this is the first study to evaluate the TWEAK/Fn14 pathway in SMA  
498 and in early stages of muscle development.

499  
500 Notably, we showed decreased expression of *Tweak* and *Fn14* in skeletal muscle of two distinct SMA mouse  
501 models during disease progression, which is contrary to previous reports of increased TWEAK/Fn14 activity  
502 in experimental models of atrophy in adult muscle [18,76,77], suggesting that the TWEAK/Fn14 pathway  
503 may have distinct roles in skeletal muscle during development and adulthood. Indeed, *Tweak* mRNA  
504 expression is significantly lower in skeletal muscle of 30-day-old WT mice compared to 90-day-old animals,  
505 suggesting an age-dependent regulation [78]. Moreover, we observed that the dysregulation of the  
506 TWEAK/Fn14 pathway in skeletal muscle of pre-weaned mice appears to be influenced by intrinsic  
507 myopathy and not denervation, which is in contrast to what has been reported in experimental models of  
508 adult muscle denervation [26,27], further suggesting distinct developmental roles for the Tweak/Fn14  
509 pathway in skeletal muscle. Given that muscles from younger mice are more resistant to surgically-induced  
510 denervation than in older mice [79], the TWEAK/Fn14 pathway may contribute to this age-dependent  
511 differential vulnerability of muscle to pathological insults. Thus, the role of TWEAK/Fn14 signaling in  
512 muscle pathology may be more nuanced and be influenced by a combination of factors such as absolute  
513 levels, downstream signaling cascades activated (e.g. canonical vs non-canonical NF- $\kappa$ B signaling  
514 pathways), developmental stage of the muscle, state of muscle atrophy (e.g. chronic vs acute) and primary  
515 origin of muscle pathology (e.g. denervation vs intrinsic insult) [20,21].

516 Another key observation from our study is a potential interaction and/or overlap between Tweak, Fn14 and  
517 Smn and their downstream signaling cascades in muscle. It has previously been demonstrated that once  
518 Tweak binds to Fn14, the complex will activate several NF- $\kappa$ B molecular effectors, including TRAF6 and  
519 IKK [80]. Interestingly, SMN has been reported to prevent the activation of TRAF6 and IKK, thereby  
520 negatively regulating the muscle atrophy-inducing canonical NF- $\kappa$ B pathway [81]. These studies thus  
521 suggest converging roles for TWEAK, Fn14 and Smn in muscle, which is further supported by our findings.  
522 Indeed, we found that independent *Tweak*, *Fn14* and *Smn* depletion had an impact on each other's expression  
523 in differentiated C2C12 cells and murine muscle. Furthermore, there was an overlap of dysregulated  
524 myogenesis, myopathy and glucose metabolism genes in SMA, *Fn14*<sup>-/-</sup> and *Tweak*<sup>-/-</sup> mice. Thus, these results  
525 suggest that aberrant expression of the TWEAK/Fn14 pathway in SMA muscle may be a consequence of  
526 combined events resulting from muscle atrophy events and reduced SMN expression.

527  
528 In addition, our results in developing mice do support the previously reported negative regulation of the  
529 metabolic factors Pgc-1 $\alpha$ , Mef2d, Glut4, Klf15, and HKII in adult muscle [29]. Further analyses of a subset  
530 of specific glucose metabolism genes showed that about 20% of these genes were dysregulated in the same  
531 direction in *Fn14*<sup>-/-</sup>, *TWEAK*<sup>-/-</sup> and SMA mice. Our KEGG analysis of these shared dysregulated metabolic  
532 genes further support the potential relationships and roles of TWEAK, Fn14 and SMN involved in the  
533 regulation of glucose metabolism. Indeed, the AMPK signaling pathway, found to be aberrantly regulated  
534 in *Fn14*<sup>-/-</sup>, *TWEAK*<sup>-/-</sup> and SMA, is as a master regulator of skeletal muscle function and metabolism [82].  
535 Interestingly, a previous study in *SMN17* SMA mice further showed that chronic treatment with the AMPK  
536 agonist AICAR prevented skeletal muscle pathology [83]. In addition, AMPK directly phosphorylates PGC-  
537 1 $\alpha$  [84], which is also dysregulated in *Smn*<sup>-/-</sup>, *Tweak*<sup>-/-</sup> and *Fn14*-depleted models [85,86]. We also found that  
538 glycolysis and pyruvate metabolic pathways, which culminate in the generation of ATP, are also  
539 dysregulated in SMA, *Fn14*<sup>-/-</sup> and *Tweak*<sup>-/-</sup> mice. Interestingly, siRNA-mediated *Smn* knockdown in NSC-  
540 34 cells showed a significant decrease in ATP production [87]. ATP was also decreased in *Smn*<sup>-/-</sup>; *SMN2* mice

541 and in *Smn* morphant zebrafish [88]. These results could explain mitochondrial dysfunction in SMA patients  
542 [7]. Thus, our study strengthens the notion of metabolic dysfunctions contributing to SMA muscle pathology  
543 and suggests a potential mechanistic link with the TWEAK/Fn14 pathway.

544

545 Our findings also confirm that not all skeletal muscles are equally affected in SMA. Indeed, we observed  
546 that the SMA skeletal muscle atrophy marker *parvalbumin* was significantly decreased from an earlier  
547 timepoint in the vulnerable triceps and gastrocnemius muscles than in the more resistant TA and quadriceps  
548 muscles. Notably, we also found that 20% more myogenesis- and myopathy-related genes were dysregulated  
549 in the more vulnerable triceps muscles of *Smn*<sup>-/-</sup>; *SMN2* mice compared to the resistant quadriceps muscles.  
550 Conversely, the number of glucose metabolism genes dysregulated in SMA triceps and quadriceps muscles  
551 was not significantly different. Previous studies have reported that muscle vulnerability is more closely  
552 associated with NMJ denervation than with location or fibre type composition [51]. Our results further  
553 suggest that denervation events in vulnerable SMA muscles have a more prominent effect on myogenesis  
554 and myopathy than on glucose metabolism.

555

556 Finally, modulating Tweak activity via Fc-TWEAK in two SMA mouse models led to interesting  
557 observations. Firstly, Fc-TWEAK administration specifically increased lifespan in the milder *Smn*<sup>2B/-</sup> mouse  
558 model while it did not impact disease progression in the severe *Smn*<sup>-/-</sup>; *SMN2* mice. This is consistent with  
559 previous studies, including ours, demonstrating that the *Smn*<sup>2B/-</sup> mice are more responsive to non-SMN  
560 treatments, perhaps due to their longer asymptomatic, and therefore adaptable period [55,71–73,89]. At a  
561 molecular level, we found that Fc-Tweak differentially impacted the expression of the *Tweak*, *Fn14* and their  
562 metabolic effectors in SMA mice and healthy littermates, perhaps reflecting disease-state dependent  
563 regulatory mechanisms of the pathway. Importantly, the expression of *Mef2d*, *HKII* and *Klf15* was  
564 significantly downregulated in Fc-TWEAK-treated SMA mice, supporting an increased activity of Tweak  
565 in the mice and a subsequent restoration towards normal levels of aberrantly regulated Tweak/Fn14 effectors.

566 As mentioned above, the timing between Fc-Tweak administration and tissue collection may have limited  
567 our analysis of the effect of Fc-Tweak on the Tweak/Fn14 signaling cascade. Nevertheless, administration  
568 of Fc-Tweak did improve muscle pathology in SMA mice as demonstrated by the partial restoration of  
569 molecular markers of muscle health and myofiber size. These results support a role for the TWEAK/Fn14  
570 pathway in maintaining skeletal muscle health and homeostasis [21]. However, it is important to note that  
571 the TWEAK/Fn14 pathway is involved in many other tissues and pathologies such as tumor development  
572 and metastasis, heart-related diseases [90], kidney injury, cerebral ischemia [91,92] and autoimmune  
573 diseases [93,94], which could have influenced the overall impact of systemically administered Fc-Tweak on  
574 muscle health and disease progression in SMA mice.

575

576

577

578

579

580

581

582

583

584

585

586

587

588

589

590



591 **CONCLUSION**

592

593 In summary, our results demonstrate a potential role and contribution of the TWEAK/Fn14 pathway to  
594 myopathy and glucose metabolism perturbations in SMA muscle. Furthermore, our study, combined with  
595 previous work in adult models [20,21], suggests that dysregulation of the TWEAK/Fn14 signaling in muscle  
596 appears to be dependent on the origin of the muscle pathology (e.g. denervation vs intrinsic) and  
597 developmental stage of skeletal muscle (e.g. newborn, juvenile, adult, aged), further highlighting the  
598 differential and conflicting activities of the pathway. Future investigations should be aimed at both furthering  
599 our understanding of the relevance of the Tweak/Fn14 pathway in SMA muscle and defining its role in  
600 general in maintaining muscle homeostasis throughout the life course.

601

602

## 603 LIST OF ABBREVIATIONS

|     |                |                                                                |
|-----|----------------|----------------------------------------------------------------|
| 604 | ALS            | amyotrophic lateral sclerosis                                  |
| 605 | ANOVA          | analysis of variance                                           |
| 606 | cDNA           | complementary deoxyribonucleic acid                            |
| 607 | DEG            | differently expressed genes                                    |
| 608 | DMEM           | Dulbecco's Modified Eagle's Media                              |
| 609 | FBS            | fetal bovine serum                                             |
| 610 | FDR            | false discovery rate                                           |
| 611 | GO             | gene ontology                                                  |
| 612 | H&E            | hematoxylin-and-eosin                                          |
| 613 | KEGG           | Kyoto Encyclopedia of Genes and Genomes                        |
| 614 | mRNA           | messenger RNA                                                  |
| 615 | NF- $\kappa$ B | nuclear factor kappa-light-chain-enhancer of activated B cells |
| 616 | NMJ            | neuromuscular junctions                                        |
| 617 | P              | postnatal day                                                  |
| 618 | <i>p</i>       | probability value                                              |
| 619 | PBS            | phosphate buffered saline                                      |
| 620 | PCR            | polymerase chain reaction                                      |
| 621 | PFA            | paraformaldehyde                                               |
| 622 | qPCR           | quantitative polymerase chain reaction                         |
| 623 | RIPA           | radioimmunoprecipitation                                       |
| 624 | RNA            | ribonucleic acid                                               |
| 625 | RNAi           | RNA interference                                               |
| 626 | RT-qPCR        | reverse transcriptase-quantitative PCR                         |
| 627 | SEM            | standard error of the mean                                     |

|     |        |                                                             |
|-----|--------|-------------------------------------------------------------|
| 628 | siRNA  | small interfering RNA                                       |
| 629 | SMA    | spinal muscular atrophy                                     |
| 630 | STRING | Search Tool for the Retrieval of Interacting Genes/Proteins |
| 631 | TA     | tibialis anterior                                           |
| 632 | WT     | wild type                                                   |
| 633 |        |                                                             |
| 634 |        |                                                             |
| 635 |        |                                                             |

636 **DECLARATIONS**

637 **Ethics approval and consent to participate**

638 Most experiments with live animals were performed at the Biomedical Services Building, University of  
639 Oxford. Experimental procedures were authorized and approved by the University of Oxford ethics  
640 committee and UK Home Office (current project license PDFEDC6F0, previous project license 30/2907) in  
641 accordance with the Animals (Scientific Procedures) Act 1986. Experiments with the *Smn*<sup>2B/-</sup> mice in Figure  
642 1 were performed at the University of Ottawa Animal Facility according to procedures authorized by the  
643 Canadian Council on Animal Care.

644

645 **Consent for publication**

646 Not applicable.

647

648 **Availability of data and materials**

649 All data generated or analyzed during this study are included in this published article or in the supplementary  
650 information.

651

652 **Competing interests**

653 The authors declare they have no competing interests.

654

655 **Funding**

656 K.E.M. was funded by the MDUK and SMA Trust (now SMA UK). M.B. was funded by the SMA Trust  
657 (now SMA UK) and Muscular Dystrophy Ireland/MRCG-HRB (MRCG-2016-21). S.K. was supported by  
658 an ERASMUS grant. P.C. received financial support from the Deutsche Muskelstiftung. R.K. was funded  
659 by the Canadian Institutes of Health Research and Muscular Dystrophy Association (USA).

660

661 **Authors' contributions**

662 Conceptualization: M.B.; Methodology: K.E.M, M.B; Validation: K.E.M., M.B.; Formal analysis: K.E.M.,  
663 E.M., S.K., M.B.; Investigations: K.E.M., E.M., D.A., B.E., S.K., G.H., N.A., M.B.; Writing - original draft  
664 preparation: K.E.M, M.B.; Writing – review and editing: K.E.M., E.M., D.A., B.E., S.K., G.H., N.A., P.C.,  
665 K.E.D., R.K., M.J.A.W., M.B.; Visualization: K.E.M., M.B.; Supervision: P.C., K.E.D., R.K., M.J.A.W.,  
666 M.B.; Project administration: M.B.; Funding acquisition: R.K., M.J.A.W., M.B.

667

668 **Acknowledgements**

669 We would like to thank the staff at the BMS facility at the University of Oxford.

670

671

672 **REFERENCES**

- 673 1. Miniño AM, Xu J, Kochanek KD. National Vital Statistics Reports, Volume 59, Number 2, (December  
674 9, 2010). 2008;
- 675 2. Lefebvre S, Bürglen L, Reboullet S, Clermont O, Burlet P, Viollet L, et al. Identification and  
676 Characterization of a Spinal Muscular Atrophy-Determining Gene. *Cell*. 1995;80:155–65.
- 677 3. Crawford TO, Pardo CA. The neurobiology of childhood spinal muscular atrophy. *Neurobiol Dis*.  
678 1996;3:97–110.
- 679 4. Swoboda KJ, Prior TW, Scott CB, McNaught TP, Wride MC, Reyna SP, et al. Natural History of  
680 Denervation in SMA: Relation to Age, SMN2 Copy Number, and Function. *Ann Neurol*. 2005;57:704–12.
- 681 5. Torres-Benito L, Ruiz R, Tabares L. Synaptic defects in spinal muscular atrophy animal models. *Dev*  
682 *Neurobiol*. 2012;72:126–33.
- 683 6. Rajendra TK, Gonsalvez GB, Walker MP, Shpargel KB, Salz HK, Matera AG. A *Drosophila melanogaster*  
684 model of spinal muscular atrophy reveals a function for SMN in striated muscle. *J Cell Biol*. 2007;176:831–  
685 41.
- 686 7. Ripolone M, Ronchi D, Violano R, Vallejo D, Fagiolari G, Barca E, et al. Impaired Muscle Mitochondrial  
687 Biogenesis and Myogenesis in Spinal Muscular Atrophy. *JAMA Neurol*. NIH Public Access; 2015;72:666–  
688 75.
- 689 8. Shafey D, Côté PD, Kothary R. Hypomorphic Snn knockdown C2C12 myoblasts reveal intrinsic defects  
690 in myoblast fusion and myotube morphology. *Exp Cell Res*. Academic Press; 2005;311:49–61.
- 691 9. Stump CS, Henriksen EJ, Wei Y, Sowers JR. The metabolic syndrome: Role of skeletal muscle  
692 metabolism. *Ann Med*. 2006;38:389–402.

- 693 10. Deguise M, Baranello G, Mastella C, Beauvais A, Michaud J, Leone A, et al. Abnormal fatty acid  
694 metabolism is a core component of spinal muscular atrophy. *Ann Clin Transl Neurol.* 2019;6:1519–32.
- 695 11. Davis RH, Miller EA, Zhang RZ, Swoboda KJ. Responses to Fasting and Glucose Loading in a Cohort  
696 of Well Children with Spinal Muscular Atrophy Type II. *J Pediatr.* 2015;167:1362-1368.e1.
- 697 12. Watson KS, Boukhloufi I, Bowerman M, Parson SH. The Relationship between Body Composition,  
698 Fatty Acid Metabolism and Diet in Spinal Muscular Atrophy. *Brain Sci.* 2021;11.
- 699 13. Djordjevic SA, Milic-Rasic V, Brankovic V, Kosac A, Dejanovic-Djordjevic I, Markovic-Denic L, et al.  
700 Glucose and lipid metabolism disorders in children and adolescents with spinal muscular atrophy types 2  
701 and 3. *Neuromuscul Disord NMD.* 2021;
- 702 14. Li Y-J, Chen T-H, Wu Y-Z, Tseng Y-H. Metabolic and Nutritional Issues Associated with Spinal  
703 Muscular Atrophy. *Nutrients.* 2020;12.
- 704 15. Boyer JG, Ferrier A, Kothary R. More than a bystander: the contributions of intrinsic skeletal muscle  
705 defects in motor neuron diseases. *Front Physiol. Frontiers Media SA;* 2013;4:356.
- 706 16. Wiley SR, Winkles JA. TWEAK, a member of the TNF superfamily, is a multifunctional cytokine that  
707 binds the TweakR/Fn14 receptor. *Cytokine Growth Factor Rev.* 14:241–9.
- 708 17. Tajrishi MM, Zheng TS, Burkly LC, Kumar A. The TWEAK-Fn14 pathway: a potent regulator of  
709 skeletal muscle biology in health and disease. *Cytokine Growth Factor Rev.* 2014;25:215–25.
- 710 18. Shuichi Sato YOMMTAK, Sato S, Ogura Y, Tajrishi MM, Kumar A. Elevated levels of TWEAK in  
711 skeletal muscle promote visceral obesity, insulin resistance, and metabolic dysfunction. *FASEB J Off Publ*  
712 *Fed Am Soc Exp Biol. The Federation of American Societies for Experimental Biology;* 2015;29:988–1002.

- 713 19. Carmona Arana JA, Seher A, Neumann M, Lang I, Siegmund D, Wajant H. TNF Receptor-Associated  
714 Factor 1 is a Major Target of Soluble TWEAK. *Front Immunol. Frontiers Media SA*; 2014;5:63.
- 715 20. Enwere EK, Lacasse EC, Adam NJ, Korneluk RG. Role of the TWEAK-Fn14-cIAP1-NF- $\kappa$ B Signaling  
716 Axis in the Regulation of Myogenesis and Muscle Homeostasis. *Front Immunol.* 2014;5:34.
- 717 21. Pascoe AL, Johnston AJ, Murphy RM. Controversies in TWEAK-Fn14 signaling in skeletal muscle  
718 atrophy and regeneration. *Cell Mol Life Sci CMLS.* 2020;
- 719 22. Tidball JG, Villalta SA. Regulatory interactions between muscle and the immune system during muscle  
720 regeneration. *Am J Physiol Regul Integr Comp Physiol.* 2010;298:R1173-87.
- 721 23. Merritt EK, Thalacker-Mercer A, Cross JM, Windham ST, Thomas SJ, Bamman MM. Increased  
722 expression of atrogenes and TWEAK family members after severe burn injury in nonburned human skeletal  
723 muscle. *J Burn Care Res Off Publ Am Burn Assoc.* 34:e297-304.
- 724 24. Enwere EK, Lacasse EC, Adam NJ, Korneluk RG. Role of the TWEAK-Fn14-cIAP1-NF- $\kappa$ B Signaling  
725 Axis in the Regulation of Myogenesis and Muscle Homeostasis. *Front Immunol.* 2014;5:34.
- 726 25. Meighan-Mantha RL, Hsu DK, Guo Y, Brown SA, Feng SL, Peifley KA, et al. The mitogen-inducible  
727 Fn14 gene encodes a type I transmembrane protein that modulates fibroblast adhesion and migration. *J Biol*  
728 *Chem.* 1999;274:33166–76.
- 729 26. Mittal A, Bhatnagar S, Kumar A, Lach-Trifilieff E, Wauters S, Li H, et al. The TWEAK-Fn14 system is  
730 a critical regulator of denervation-induced skeletal muscle atrophy in mice. *J Cell Biol.* 2010;188:833–49.
- 731 27. Bowerman M, Salsac C, Coque E, Eiselt É, Deschaumes RG, Brodovitch A, et al. Tweak regulates  
732 astrogliosis, microgliosis and skeletal muscle atrophy in a mouse model of amyotrophic lateral sclerosis.  
733 *Hum Mol Genet.* 2015;24:3440–56.



- 734 28. Arany Z. PGC-1 coactivators and skeletal muscle adaptations in health and disease. *Curr Opin Genet*  
735 *Dev.* 2008;18:426–34.
- 736 29. Sato S, Ogura Y, Tajrishi MM, Kumar A. Elevated levels of TWEAK in skeletal muscle promote visceral  
737 obesity, insulin resistance, and metabolic dysfunction. *FASEB J Off Publ Fed Am Soc Exp Biol.*  
738 2015;29:988–1002.
- 739 30. Sato S, Ogura Y, Kumar A. TWEAK/Fn14 Signaling Axis Mediates Skeletal Muscle Atrophy and  
740 Metabolic Dysfunction. *Front Immunol.* 2014;5:18.
- 741 31. Klip A, McGraw TE, James DE. Thirty sweet years of GLUT4. *J Biol Chem.* 2019;294:11369–81.
- 742 32. Roberts DJ, Miyamoto S. Hexokinase II integrates energy metabolism and cellular protection: Akt  
743 on mitochondria and TORCing to autophagy. *Cell Death Differ.* 2015;22:248–57.
- 744 33. Aziz A, Liu Q-C, Dilworth FJ. Regulating a master regulator: establishing tissue-specific gene expression  
745 in skeletal muscle. *Epigenetics.* 2010;5:691–5.
- 746 34. Fan L, Hsieh PN, Sweet DR, Jain MK. Krüppel-like factor 15: Regulator of BCAA metabolism and  
747 circadian protein rhythmicity. *Pharmacol Res.* 2018;130:123–6.
- 748 35. Wood MJA, Talbot K, Bowerman M. Spinal muscular atrophy: antisense oligonucleotide therapy opens  
749 the door to an integrated therapeutic landscape. *Hum Mol Genet.* 2017;26:R151–9.
- 750 36. Boyer JG, Ferrier A, Kothary R. More than a bystander: the contributions of intrinsic skeletal muscle  
751 defects in motor neuron diseases. *Front Physiol.* 2013;4:356.
- 752 37. Hsieh-Li HM, Chang JG, Jong YJ, Wu MH, Wang NM, Tsai CH, et al. A mouse model for spinal  
753 muscular atrophy. *Nat Genet.* 2000;24:66–70.

- 754 38. Bowerman M, Murray LM, Beauvais A, Pinheiro B, Kothary R. A critical smn threshold in mice dictates  
755 onset of an intermediate spinal muscular atrophy phenotype associated with a distinct neuromuscular  
756 junction pathology. *Neuromuscul Disord NMD*. 2012;22:263–76.
- 757 39. Taketo M, Schroeder AC, Mobraaten LE, Gunning KB, Hanten G, Fox RR, et al. FVB/N: an inbred  
758 mouse strain preferable for transgenic analyses. *Proc Natl Acad Sci U S A. National Academy of Sciences*;  
759 1991;88:2065–9.
- 760 40. Mekada K, Abe K, Murakami A, Nakamura S, Nakata H, Moriwaki K, et al. Genetic differences among  
761 C57BL/6 substrains. *Exp Anim*. 2009;58:141–9.
- 762 41. Hsieh-Li HM, Chang J-GG, Jong Y-JJ, Wu M-HH, Wang NM, Tsai CH, et al. A mouse model for spinal  
763 muscular atrophy. *Nat Genet. Nature Publishing Group*; 2000;24:66–70.
- 764 42. Eshraghi M, McFall E, Gibeault S, Kothary R. Effect of genetic background on the phenotype of the  
765 *Smn2B<sup>-/-</sup>* mouse model of spinal muscular atrophy. *Hum Mol Genet*. 2016;25:4494–506.
- 766 43. Campbell S, Burkly LC, Gao H-X, Berman JW, Su L, Browning B, et al. Proinflammatory effects of  
767 TWEAK/Fn14 interactions in glomerular mesangial cells. *J Immunol Baltim Md 1950*. 2006;176:1889–98.
- 768 44. Jakubowski A, Ambrose C, Parr M, Lincecum JM, Wang MZ, Zheng TS, et al. TWEAK induces liver  
769 progenitor cell proliferation. *J Clin Invest*. 2005;115:2330–40.
- 770 45. Schindelin J, Arganda-Carreras I, Frise E, Kaynig V, Longair M, Pietzsch T, et al. Fiji: an open-source  
771 platform for biological-image analysis. *Nat Methods. Nature Publishing Group*; 2012;9:676–82.
- 772 46. Yaffe D, Saxel O. Serial passaging and differentiation of myogenic cells isolated from dystrophic mouse  
773 muscle. *Nature. Nature Publishing Group*; 1977;270:725–7.

- 774 47. Cashman NR, Durham HD, Blusztajn JK, Oda K, Tabira T, Shaw IT, et al. Neuroblastoma × spinal cord  
775 (NSC) hybrid cell lines resemble developing motor neurons. *Dev Dyn*. 1992;194:209–21.
- 776 48. Pfaffl MW. A new mathematical model for relative quantification in real-time RT-PCR. *Nucleic Acids*  
777 *Res*. Oxford University Press (OUP); 2001;29:45e–45.
- 778 49. Radonić A, Thulke S, Mackay IM, Landt O, Siegert W, Nitsche A. Guideline to reference gene selection  
779 for quantitative real-time PCR. *Biochem Biophys Res Commun*. 2004;313:856–62.
- 780 50. Szklarczyk D, Morris JH, Cook H, Kuhn M, Wyder S, Simonovic M, et al. The STRING database in  
781 2017: quality-controlled protein–protein association networks, made broadly accessible. *Nucleic Acids Res*.  
782 2017;45:D362–8.
- 783 51. Ling KKY, Gibbs RM, Feng Z, Ko C-PC-P. Severe neuromuscular denervation of clinically relevant  
784 muscles in a mouse model of spinal muscular atrophy. *Hum Mol Genet*. 2012;21:185–95.
- 785 52. Olive M, Ferrer I. Parvalbumin immunohistochemistry in denervated skeletal muscle. *Neuropathol Appl*  
786 *Neurobiol*. 1994;20:495–500.
- 787 53. Müntener M, Berchtold MW, Heizmann CW. Parvalbumin in cross-reinnervated and denervated  
788 muscles. *Muscle Nerve*. 1985;8:132–7.
- 789 54. Mutsaers CA, Wishart TM, Lamont DJ, Riessland M, Schreml J, Comley LH, et al. Reversible molecular  
790 pathology of skeletal muscle in spinal muscular atrophy. *Hum Mol Genet*. 2011;20:4334–44.
- 791 55. Walter LM, Deguise M-O, Meijboom KE, Betts CA, Ahlskog N, van Westering TLE, et al. Interventions  
792 Targeting Glucocorticoid-Krüppel-like Factor 15-Branched-Chain Amino Acid Signaling Improve Disease  
793 Phenotypes in Spinal Muscular Atrophy Mice. *EBioMedicine*. 2018;31:226–42.

- 794 56. Li H, Mittal A, Paul PK, Kumar M, Srivastava DS, Tyagi SC, et al. Tumor Necrosis Factor-related Weak  
795 Inducer of Apoptosis Augments Matrix Metalloproteinase 9 (MMP-9) Production in Skeletal Muscle  
796 through the Activation of Nuclear Factor- $\kappa$ B-inducing Kinase and p38 Mitogen-activated Protein Kinase.  
797 J Biol Chem. 2009;284:4439–50.
- 798 57. Varfolomeev E, Goncharov T, Maecker H, Zobel K, Kömüves LG, Deshayes K, et al. Cellular inhibitors  
799 of apoptosis are global regulators of NF- $\kappa$ B and MAPK activation by members of the TNF family of  
800 receptors. Sci Signal. 2012;5:ra22.
- 801 58. Li Y, Kang J, Friedman J, Tarassishin L, Ye J, Kovalenko A, et al. Identification of a cell protein (FIP-  
802 3) as a modulator of NF- $\kappa$ B activity and as a target of an adenovirus inhibitor of tumor necrosis factor -  
803 induced apoptosis. Proc Natl Acad Sci. National Academy of Sciences; 1999;96:1042–7.
- 804 59. Magill CK, Tong A, Kawamura D, Hayashi A, Hunter DA, Parsadanian A, et al. Reinnervation of the  
805 tibialis anterior following sciatic nerve crush injury: a confocal microscopic study in transgenic mice. Exp  
806 Neurol. NIH Public Access; 2007;207:64–74.
- 807 60. McCullagh KJA, Edwards B, Kemp MW, Giles LC, Burgess M, Davies KE. Analysis of skeletal muscle  
808 function in the C57BL6/SV129 syncoilin knockout mouse. Mamm Genome. 2008;19:339–51.
- 809 61. Yan Z, Choi S, Liu X, Zhang M, Schageman JJ, Lee SY, et al. Highly coordinated gene regulation in  
810 mouse skeletal muscle regeneration. J Biol Chem. American Society for Biochemistry and Molecular  
811 Biology; 2003;278:8826–36.
- 812 62. Mittal A, Bhatnagar S, Kumar A, Paul PK, Kuang S, Kumar A. Genetic ablation of TWEAK augments  
813 regeneration and post-injury growth of skeletal muscle in mice. Am J Pathol. 2010;177:1732–42.
- 814 63. Kariya S, Obis T, Garone C, Akay T, Sera F, Iwata S, et al. Requirement of enhanced Survival  
815 Motoneuron protein imposed during neuromuscular junction maturation. J Clin Invest. 2014;124:785–800.

- 816 64. Garry GA, Antony ML, Garry DJ. Cardiotoxin Induced Injury and Skeletal Muscle Regeneration. In:  
817 Kyba M, editor. Skelet Muscle Regen Mouse Methods Protoc [Internet]. New York, NY: Springer; 2016  
818 [cited 2020 May 28]. p. 61–71. Available from: [https://doi.org/10.1007/978-1-4939-3810-0\\_6](https://doi.org/10.1007/978-1-4939-3810-0_6)
- 819 65. Girgenrath M, Weng S, Kostek CA, Browning B, Wang M, Brown SAN, et al. TWEAK, via its receptor  
820 Fn14, is a novel regulator of mesenchymal progenitor cells and skeletal muscle regeneration. *EMBO J*.  
821 2006;25:5826–39.
- 822 66. Yin H, Price F, Rudnicki MA. Satellite Cells and the Muscle Stem Cell Niche. *Physiol Rev*. 2013;93:23–  
823 67.
- 824 67. von Maltzahn J, Jones AE, Parks RJ, Rudnicki MA. Pax7 is critical for the normal function of satellite  
825 cells in adult skeletal muscle. *Proc Natl Acad Sci U S A*. National Academy of Sciences; 2013;110:16474–  
826 9.
- 827 68. Savarese M, Sarparanta J, Vihola A, Udd B, Hackman P. Increasing Role of Titin Mutations in  
828 Neuromuscular Disorders. *J Neuromuscul Dis*. IOS Press; 2016;3:293–308.
- 829 69. Bowerman M, Swoboda KJ, Michalski J-P, Wang G-S, Reeks C, Beauvais A, et al. Glucose metabolism  
830 and pancreatic defects in spinal muscular atrophy. *Ann Neurol*. 2012;72:256–68.
- 831 70. Bodine SC, Latres E, Baumhueter S, Lai VK, Nunez L, Clarke BA, et al. Identification of ubiquitin  
832 ligases required for skeletal muscle atrophy. *Science*. American Association for the Advancement of  
833 Science; 2001;294:1704–8.
- 834 71. Bowerman M, Beauvais A, Anderson CL, Kothary R. Rho-kinase inactivation prolongs survival of an  
835 intermediate SMA mouse model. *Hum Mol Genet*. 2010;19:1468–78.

- 836 72. Kaifer KA, Villalón E, Osman EY, Glascock JJ, Arnold LL, Cornelison DDW, et al. Plastin-3 extends  
837 survival and reduces severity in mouse models of spinal muscular atrophy. *JCI Insight*. 2017;2:e89970.
- 838 73. Osman EY, Rietz A, Kline RA, Cherry JJ, Hodgetts KJ, Lorson CL, et al. Intraperitoneal delivery of a  
839 novel drug-like compound improves disease severity in severe and intermediate mouse models of Spinal  
840 Muscular Atrophy. *Sci Rep*. 2019;9:1633.
- 841 74. Martínez-Hernández R, Soler-Botija C, Also E, Alias L, Caselles L, Gich I, et al. The developmental  
842 pattern of myotubes in spinal muscular atrophy indicates prenatal delay of muscle maturation. *J Neuropathol*  
843 *Exp Neurol*. Oxford University Press; 2009;68:474–81.
- 844 75. Martínez-Hernández R, Bernal S, Alias L, Tizzano EF. Abnormalities in Early Markers of Muscle  
845 Involvement Support a Delay in Myogenesis in Spinal Muscular Atrophy. *J Neuropathol Exp Neurol*. Oxford  
846 University Press; 2014;73:559–67.
- 847 76. Liu H, Peng H, Xiang H, Guo L, Chen R, Zhao S, et al. TWEAK/Fn14 promotes oxidative stress through  
848 AMPK/PGC-1 $\alpha$ /MnSOD signaling pathway in endothelial cells. *Mol Med Rep*. Spandidos Publications;  
849 2017;17:1998–2004.
- 850 77. Hindi SM, Mishra V, Bhatnagar S, Tajrishi MM, Ogura Y, Yan Z, et al. Regulatory circuitry of TWEAK-  
851 Fn14 system and PGC-1 $\alpha$  in skeletal muscle atrophy program. *FASEB J Off Publ Fed Am Soc Exp Biol*.  
852 2014;28:1398–411.
- 853 78. Bowerman M, Salsac C, Coque E, Eiselt E, Deschaumes RG, Brodovitch A, et al. Tweak regulates  
854 astrogliosis, microgliosis and skeletal muscle atrophy in a mouse model of amyotrophic lateral sclerosis.  
855 *Hum Mol Genet*. Oxford University Press; 2015;24:ddv094-.
- 856 79. Murray LM, Comley LH, Gillingwater TH, Parson SH. The response of neuromuscular junctions to  
857 injury is developmentally regulated. *FASEB J*. 2011;25:1306–13.

- 858 80. Kumar A, Bhatnagar S, Paul PK. TWEAK and TRAF6 regulate skeletal muscle atrophy. *Curr Opin Clin*  
859 *Nutr Metab Care*. NIH Public Access; 2012;15:233–9.
- 860 81. Kim EK, Choi E-J. SMN1 functions as a novel inhibitor for TRAF6-mediated NF- $\kappa$ B signaling. *Biochim*  
861 *Biophys Acta BBA - Mol Cell Res*. Elsevier; 2017;1864:760–70.
- 862 82. Kjøbsted R, Hingst JR, Fentz J, Foretz M, Sanz M-N, Pehmøller C, et al. AMPK in skeletal muscle  
863 function and metabolism. *FASEB J Off Publ Fed Am Soc Exp Biol*. 2018;32:1741–77.
- 864 83. Cerveró C, Montull N, Tarabal O, Piedrafita L, Esquerda JE, Calderó J. Chronic Treatment with the  
865 AMPK Agonist AICAR Prevents Skeletal Muscle Pathology but Fails to Improve Clinical Outcome in a  
866 Mouse Model of Severe Spinal Muscular Atrophy. *Neurother J Am Soc Exp Neurother*. Springer;  
867 2016;13:198–216.
- 868 84. Irrcher I, Ljubcic V, Kirwan AF, Hood DA. AMP-Activated Protein Kinase-Regulated Activation of  
869 the PGC-1 $\alpha$  Promoter in Skeletal Muscle Cells. Lucia A, editor. *PLoS ONE*. 2008;3:e3614.
- 870 85. Hindi SM, Mishra V, Bhatnagar S, Tajrishi MM, Ogura Y, Yan Z, et al. Regulatory circuitry of TWEAK-  
871 Fn14 system and PGC-1 $\alpha$  in skeletal muscle atrophy program. *FASEB J Off Publ Fed Am Soc Exp Biol*.  
872 2014;28:1398–411.
- 873 86. Ng SY, Mikhail A, Ljubcic V. Mechanisms of exercise-induced survival motor neuron expression in  
874 the skeletal muscle of spinal muscular atrophy-like mice. *J Physiol*. 2019;597:4757–78.
- 875 87. Acsadi G, Lee I, Li X, Khaidakov M, Pecinova A, Parker GC, et al. Mitochondrial dysfunction in a  
876 neural cell model of spinal muscular atrophy. *J Neurosci Res*. 2009;87:2748–56.

- 877 88. Boyd PJ, Tu W-Y, Shorrock HK, Groen EJM, Carter RN, Powis RA, et al. Bioenergetic status modulates  
878 motor neuron vulnerability and pathogenesis in a zebrafish model of spinal muscular atrophy. Cox GA,  
879 editor. PLOS Genet. Public Library of Science; 2017;13:e1006744.
- 880 89. Bowerman M, Murray LM, Boyer JG, Anderson CL, Kothary R. Fasudil improves survival and promotes  
881 skeletal muscle development in a mouse model of spinal muscular atrophy. BMC Med. 2012;10:24.
- 882 90. Jain M, Jakubowski A, Cui L, Shi J, Su L, Bauer M, et al. A Novel Role for Tumor Necrosis Factor-Like  
883 Weak Inducer of Apoptosis (TWEAK) in the Development of Cardiac Dysfunction and Failure. Circulation.  
884 2009;119:2058–68.
- 885 91. Inta I, Frauenknecht K, Dörr H, Kohlhof P, Rabsilber T, Auffarth GU, et al. Induction of the cytokine  
886 TWEAK and its receptor Fn14 in ischemic stroke. J Neurol Sci. 2008;275:117–20.
- 887 92. Haile WB, Echeverry R, Wu F, Guzman J, An J, Wu J, et al. Tumor necrosis factor-like weak inducer of  
888 apoptosis and fibroblast growth factor-inducible 14 mediate cerebral ischemia-induced poly(ADP-ribose)  
889 polymerase-1 activation and neuronal death. Neuroscience. 2010;171:1256–64.
- 890 93. Yamana J, Morand EF, Manabu T, Sunahori K, Takasugi K, Makino H, et al. Inhibition of TNF-induced  
891 IL-6 by the TWEAK-Fn14 interaction in rheumatoid arthritis fibroblast like synoviocytes. Cell Immunol.  
892 2012;272:293–8.
- 893 94. El-shehaby A, Darweesh H, El-Khatib M, Momtaz M, Marzouk S, El-Shaarawy N, et al. Correlations of  
894 Urinary Biomarkers, TNF-Like Weak Inducer of Apoptosis (TWEAK), Osteoprotegerin (OPG), Monocyte  
895 Chemoattractant Protein-1 (MCP-1), and IL-8 with Lupus Nephritis. J Clin Immunol. 2011;31:848–56.
- 896  
897  
898



899

900

901

902

903

904

905

906

907

908 **FIGURE LEGENDS**

909 **Figure 1. Aberrant expression of the TWEAK/Fn14 signaling pathway in skeletal muscle of SMA mice.**

910 **a-g.** qPCR analysis of *parvalbumin* (**a**), *Tweak* (**b**), *Fn14* (**c**), *Pgc-1 $\alpha$*  (**d**), *Mef2d* (**e**), *Glut-4* (**f**) and *HKII* (**g**)  
911 in triceps, gastrocnemius, TA and quadriceps muscles from post-natal day (P) 0 (birth), P2 (pre-  
912 symptomatic), P5 (early-symptomatic), P7 (late symptomatic) and P19 (end-stage) *Smn*<sup>-/-</sup>; *SMN2* and wild  
913 type (WT) mice. Data are mean  $\pm$  SEM, n = 3-4 animals per experimental group, two-way ANOVA, Sidak's  
914 multiple comparison test, \*  $p < 0.05$ , \*\*  $p < 0.01$ , \*\*\*  $p < 0.001$ , \*\*\*\*  $p < 0.0001$ . **h-i.** Quantification of NF-  
915  $\kappa$ B p50/actin protein levels in the TA of pre-symptomatic (P2) (**h**) and late-symptomatic (P7) (**i**) *Smn*<sup>-/-</sup>  
916 ; *SMN2* mice and age-matched WT animals. Images are representative immunoblots. Data are mean  $\pm$  SEM,  
917 n = 3-4 animals per experimental group, unpaired *t* test, ns = not significant (**h**),  $p = 0.0215$  (**i**). **j.** qPCR  
918 analysis *NF- $\kappa$ B inducing kinase* (*NIK*) in TA muscle of late-symptomatic P7 *Smn*<sup>-/-</sup>; *SMN2* and age-matched  
919 WT animals. Data are mean  $\pm$  SEM, n = 3-4 animals per experimental group, unpaired *t* test,  $p = 0.0094$ . **k-**  
920 **q.** qPCR analysis of *parvalbumin* (**k**), *Tweak* (**l**), *Fn14* (**m**), *Pgc-1 $\alpha$*  (**n**), *Mef2d* (**o**), *Glut-4* (**p**) and *HKII* (**q**)  
921 in TA muscles from P0 (birth), P2 (pre-symptomatic), P4 (pre-symptomatic), P11 (early symptomatic) and  
922 P19 (end-stage) *Smn*<sup>2B/-</sup> and WT mice. Data are mean  $\pm$  SEM, n = 3-4 animals per experimental group, two-  
923 way ANOVA, Sidak's multiple comparison test, \*  $p < 0.05$ , \*\*  $p < 0.01$ , \*\*\*  $p < 0.001$ , \*\*\*\*  $p < 0.0001$ .

924 **Figure 2. The TWEAK/Fn14 signaling pathway is not dysregulated in denervated muscles of pre-**

925 **weaned mice.** A sciatic nerve crush was performed on post-natal day (P) 7 WT FVB/N mice and both  
926 ipsilateral (nerve crush) and contralateral (control) TA muscles were harvested at P14. **a.** Representative  
927 images of hematoxylin and eosin-stained cross-sections of control and nerve crush TA muscles. Scale bars  
928 = 100  $\mu$ m. **b.** Myofiber area in control and nerve crush TA muscles. Data are mean  $\pm$  SEM, n = 3-6 animals  
929 per experimental group, unpaired *t* test,  $p = 0.0020$ . **c.** Myofiber size distribution in control and nerve crush  
930 TA muscles. **d.** qPCR analysis of *parvalbumin*, *Tweak*, *Fn14*, *Pgc-1 $\alpha$* , *Mef2d*, *Glut-4*, *HKII*, *Klf15* and *Smn*

931 in control and nerve crush TA muscles. Data are mean  $\pm$  SEM,  $n = 4-6$  animals per experimental group, two-  
932 way ANOVA, uncorrected Fisher's LSD, ns = not significant.

933

934 **Figure 3. The TWEAK/Fn14 signaling pathway is dysregulated in cardiotoxin-induced muscle**

935 **necrosis in pre-weaned mice.** Cardiotoxin was injected in the left TA muscle of post-natal day (P) 10. The

936 right TA muscle was injected with equal volumes of 0.9% saline. TA muscles were harvested 6 days later.

937 **a.** Representative images of hematoxylin and eosin-stained cross-sections of saline- and cardiotoxin-injected

938 TA muscles. Scale bars = 100  $\mu$ m. **b.** Percentage of muscle fibers with centrally-located nuclei in saline- and

939 cardiotoxin-injected TA muscles. Data are mean  $\pm$  SEM,  $n = 3$  animals per experimental group, unpaired  $t$

940 test,  $p = 0.0020$ . **c.** qPCR analysis of *parvalbumin*, *Tweak*, *Fn14*, *Pgc-1 $\alpha$* , *Mef2d*, *Glut-4*, *HKII*, *Klf15* and

941 *Smn* in saline- and cardiotoxin-injected TA muscles. Data are mean  $\pm$  SEM,  $n = 3$  animals per experimental

942 group, two-way ANOVA, uncorrected Fisher's LSD, ns = not significant, \*  $p < 0.05$ , \*\*\*  $p < 0.001$ , \*\*\*\*  $p$

943  $< 0.0001$ .

944

945 **Figure 4. *Smn*, *Tweak* and *Fn14* depletion impact each other's expression and that of the Tweak/Fn14**

946 **signaling pathway. a-b.** qPCR analysis of *parvalbumin*, *Tweak*, *Fn14*, *Pgc-1 $\alpha$* , *Mef2d*, *Glut-4*, *HKII*, *Klf15*

947 and *Smn* in triceps muscle from post-natal day (P) 7 *Tweak*<sup>-/-</sup> (**a**) and *Fn14*<sup>-/-</sup> (**b**) mice. Data are mean  $\pm$  SEM,

948  $n = 4$  animals per experimental group, two-way ANOVA, uncorrected Fisher's LSD, ns = not significant, \*

949  $p < 0.05$ , \*\*\*  $p < 0.001$ , \*\*\*\*  $p < 0.0001$ . **c-j.** qPCR analysis of *Smn* (**c**), *Tweak* (**d**), *Fn14* (**e**), *Pgc-1 $\alpha$*  (**f**),

950 *Mef2d* (**g**), *Glut-4* (**h**), *HKII* (**i**) and *Klf15* (**j**) in siRNA-mediated *Tweak*-, *Fn14*- and *Smn*-depleted and

951 control proliferating (Day 0) and differentiated (Day 7) C2C12 cells. Data are mean  $\pm$  SEM,  $n = 3$  per

952 experimental group, two-way ANOVA, Dunnett's multiple comparisons test, \*  $p < 0.05$ , \*\*  $p < 0.01$ , \*\*\*  $p$

953  $< 0.001$ , \*\*\*\*  $p < 0.0001$ . **k.** Proposed model of the relationship between *Smn* and the Tweak/Fn14 signaling

954 pathway. Red lines represent inhibition and blue lines represent activation.

955

956 **Figure 5. Overlap between dysregulated genes involved in myopathy, myogenesis and glucose**  
957 **metabolism in skeletal muscle of *Smn*<sup>-/-</sup>;*SMN2*, *Fn14*<sup>-/-</sup> and *Tweak*<sup>-/-</sup> mice. a.** Venn diagram showing  
958 overlap of genes involved in myopathy and myogenesis that are significantly dysregulated in the same  
959 direction (either up or downregulated,  $p < 0.05$ ) in triceps and quadriceps muscle from post-natal day (P) 7  
960 compared to *Smn*<sup>-/-</sup>;*SMN2*, *Fn14*<sup>-/-</sup> and *Tweak*<sup>-/-</sup> mice to age- and genetic strain-matched wild type (WT)  
961 mice. **b.** Network and enrichment analysis of the overlap of significantly dysregulated myopathy and  
962 myogenesis genes in triceps and/or quadriceps of P7 *Smn*<sup>-/-</sup>;*SMN2*, *Fn14*<sup>-/-</sup> and *Tweak*<sup>-/-</sup> mice using STRING  
963 software. *Smn* (*Smn1*), TWEAK (*Tnfsf12*) and *Fn14* (*Tnfrsf12a*) are included in the analysis. Corresponding  
964 protein nodes in the network are highlighted in color. The connection color and shape between proteins  
965 represent protein-protein associations (Action types) and if the association is positive, negative or  
966 unspecified (Action effects). **c.** Venn diagram showing overlap of genes involved in glucose metabolism that  
967 are significantly dysregulated in the same direction (either up or downregulated,  $p < 0.05$ ) in triceps and  
968 quadriceps muscle from P7 compared to *Smn*<sup>-/-</sup>;*SMN2*, *Fn14*<sup>-/-</sup> and *Tweak*<sup>-/-</sup> mice to age- and genetic strain-  
969 matched WT mice. **d.** Network and enrichment analysis of the overlap of significantly dysregulated  
970 myopathy and myogenesis genes in triceps and/or quadriceps of P7 *Smn*<sup>-/-</sup>;*SMN2*, *Fn14*<sup>-/-</sup> and *Tweak*<sup>-/-</sup> mice  
971 using STRING software. *Smn* (*Smn1*), TWEAK (*Tnfsf12*), *Fn14* (*Tnfrsf12a*), HKII (*Hk2*), Glut4 (*Slc2a4*),  
972 *Pgc-1α* (*Ppargc1a*), *Klf15* and *Mef2d* are included in the analysis. Corresponding protein KEGG pathways  
973 with the six lowest FDRs highlighted in color (see Table 3). The connection color and shape between proteins  
974 represent protein-protein associations (Action types) and if the association is positive, negative or  
975 unspecified (Action effects).

976

977 **Figure 6. Increasing Tweak activity via Fc-TWEAK improves disease phenotypes in two SMA mouse**  
978 **models. a.** Daily weights of untreated *Smn*<sup>-/-</sup>;*SMN2* SMA mice and *Smn*<sup>-/-</sup>;*SMN2* mice that received daily  
979 subcutaneous injections (starting at P0) of Fc-TWEAK or IgG control (15.8 μg). Data are mean ± SEM, n =  
980 7-10 animals per experimental group, two-way ANOVA, Sidak's multiple comparison test. **b.** Survival

981 curves of untreated *Smn*<sup>-/-</sup>; *SMN2* SMA mice and *Smn*<sup>-/-</sup>; *SMN2* that received daily subcutaneous injections of  
982 Fc-TWEAK or IgG control (15.8 μg). Data are represented as Kaplan-Meier survival curves, n = 7-10  
983 animals per experimental group, Log-rank (Mantel-Cox). **c-i.** qPCR analysis of *Tweak* (**c**), *Fnl4* (**d**), *Pgc-*  
984 *1α* (**e**), *Mef2d* (**f**), *Glut-4* (**g**), *HKII* (**h**) and *Klf15* (**i**) in triceps of post-natal day (P) 7 untreated and Fc-  
985 TWEAK-treated (15.8 μg) *Smn*<sup>-/-</sup>; *SMN2* SMA and *Smn*<sup>+/-</sup>; *SMN2* health littermates. Data are mean ± SEM,  
986 n = 3-4 animals per experimental group, two-way ANOVA, uncorrected Fisher's LSD, \* *p* < 0.05, \*\*\* *p*  
987 < 0.001. **j.** Representative images of laminin-stained cross-sections of TA muscles from P7 untreated and Fc-  
988 TWEAK-treated (15.8 μg) *Smn*<sup>-/-</sup>; *SMN2* SMA and *Smn*<sup>+/-</sup>; *SMN2* health littermates. Scale bars = 100 μm. **k.**  
989 Quantification of myofiber area in the TAs of P7 untreated and Fc-TWEAK-treated (15.8 μg) *Smn*<sup>-/-</sup>; *SMN2*  
990 SMA and *Smn*<sup>+/-</sup>; *SMN2* health littermates. Data are mean ± SEM, n = 3-4 animals per experimental group  
991 (>550 myofibers per experimental group), two-way ANOVA, Tukey's multiple comparison test, \* *p* < 0.05,  
992 \*\*\*\* *p* < 0.0001. **l.** Relative frequency distribution of myofiber size in TA muscles of of P7 untreated and  
993 Fc-TWEAK-treated (15.8 μg) *Smn*<sup>-/-</sup>; *SMN2* SMA and *Smn*<sup>+/-</sup>; *SMN2* health littermates. **m-r.** qPCR analysis  
994 of *parvalbumin* (**m**), *MuRF-1* (**n**), *atrogen-1* (**o**), *Myod1* (**p**), and *myogenin* (**r**) in triceps of P7 untreated and  
995 Fc-TWEAK-treated (15.8 μg) *Smn*<sup>-/-</sup>; *SMN2* SMA and *Smn*<sup>+/-</sup>; *SMN2* health littermates. Data are mean ±  
996 SEM, n = 3-4 animals per experimental group, two-way ANOVA, uncorrected Fisher's LSD, \* *p* < 0.05, \*\*  
997 *p* < 0.01. **s.** Daily weights of untreated *Smn*<sup>2B/-</sup> SMA mice and *Smn*<sup>2B/-</sup> mice that received subcutaneous  
998 injections of Fc-TWEAK or IgG control (15.8 μg) every 4 days (starting at P0). Data are mean ± SEM, n =  
999 9-12 animals per experimental group, two-way ANOVA, Sidak's multiple comparison test. **t.** Survival  
1000 curves of untreated *Smn*<sup>2B/-</sup> SMA mice and *Smn*<sup>2B/-</sup> mice that received subcutaneous injections of Fc-TWEAK  
1001 or IgG control (15.8 μg) every 4 days (starting at P0). Data are Kaplan-Meier survival curves, n = 9-12  
1002 animals per experimental group, Log-rank (Mantel-Cox), *p* = 0.0162. **u.** qPCR analysis of *Glut-4* in P15  
1003 *Smn*<sup>2B/-</sup> SMA mice and *Smn*<sup>2B/-</sup> mice that received subcutaneous injections of Fc-TWEAK or IgG control

1004 (15.8  $\mu$ g) every 4 days (starting at P0). Data are mean  $\pm$  SEM, n = 3-4 animals per experimental group, two-  
1005 way ANOVA, uncorrected Fisher's LSD, \*  $p < 0.05$ .  
1006

1007 **TABLES**

1008 **Table 1.** Myogenesis and myopathy genes significantly dysregulated in the same direction in triceps and  
1009 quadriceps of P7 *Smn*<sup>-/-</sup>; *SMN2*, *Fn14*<sup>-/-</sup> and *Tweak*<sup>-/-</sup> mice when compared to P7 WT mice.

1010

1011 **Table 2.** Glucose metabolism genes significantly dysregulated in the same direction in triceps and  
1012 quadriceps of P7 *Smn*<sup>-/-</sup>; *SMN2*, *Fn14*<sup>-/-</sup> and *Tweak*<sup>-/-</sup> mice when compared to P7 WT mice.

1013

1014 **Table 3.** KEGG pathways generated from glucose metabolism genes that were are significantly dysregulated  
1015 in the same direction in triceps and quadriceps of P7 *Smn*<sup>-/-</sup>; *SMN2*, *Fn14*<sup>-/-</sup> and *Tweak*<sup>-/-</sup> mice when compared  
1016 to P7 WT mice.

1017

1018 **SUPPLEMENTARY FIGURE LEGENDS**

1019 **Supplementary Figure 1. Effect of varying Fc-TWEAK on disease progression in *Smn*<sup>-/-</sup>;*SMN2* SMA**

1020 **mice.** *Smn*<sup>-/-</sup>;*SMN2* mice received daily subcutaneous injections of increasing doses of Fc-TWEAK (7.9, 15.,

1021 23.7 and 31.6 µg), starting at birth. **a.** Daily weights of untreated *Smn*<sup>-/-</sup>;*SMN2* SMA mice and *Smn*<sup>-/-</sup>;*SMN2*

1022 mice that received daily subcutaneous injections (starting at P0) of Fc-TWEAK (7.9, 15.8, 23.7 and 31.6

1023 µg). Data are mean ± SEM, n = 5-10 animals per experimental group, two-way ANOVA, Sidak's multiple

1024 comparison test. **b.** Survival curves of untreated *Smn*<sup>-/-</sup>;*SMN2* SMA mice and *Smn*<sup>-/-</sup>;*SMN2* mice that

1025 received daily subcutaneous injections (starting at P0) of Fc-TWEAK (7.9, 15.8, 23.7 and 31.6 µg). Data are

1026 presented as Kaplan-Meier survival curves, n = 5-10 animals per experimental group, Log-rank (Mantel-

1027 Cox).

1028



1029 **SUPPLEMENTARY TABLES**

1030

1031 **Supplementary Table 1. Mouse primers used for quantitative real-time PCR.**

1032

1033

1034

1035

1036

1037

1038

1039

1040

1041

1042

1043

1044

1045

1046

1047

1048

1049

1050

1051

1052

1053

1054 **SUPPLEMENTARY FILES**

1055 **Supplementary File 1.** Myopathy and myogenesis gene expression changes in triceps and quadriceps  
1056 of post-natal day 7 *Smn*<sup>-/-</sup>; *SMN2* (SMA), *Tweak*<sup>-/-</sup> (Tweak KO) and *Fn14*<sup>-/-</sup>; (Fn14 KO) compared to  
1057 age- and genetic strain-matched wild type animals.

1058

1059 **Supplementary File 2.** Glucose metabolism gene expression changes in triceps and quadriceps  
1060 of post-natal day 7 *Smn*<sup>-/-</sup>; *SMN2* (SMA), *Tweak*<sup>-/-</sup> (Tweak KO) and *Fn14*<sup>-/-</sup>; (Fn14 KO) compared to age-  
1061 and genetic strain-matched wild type animals.

1062

1063

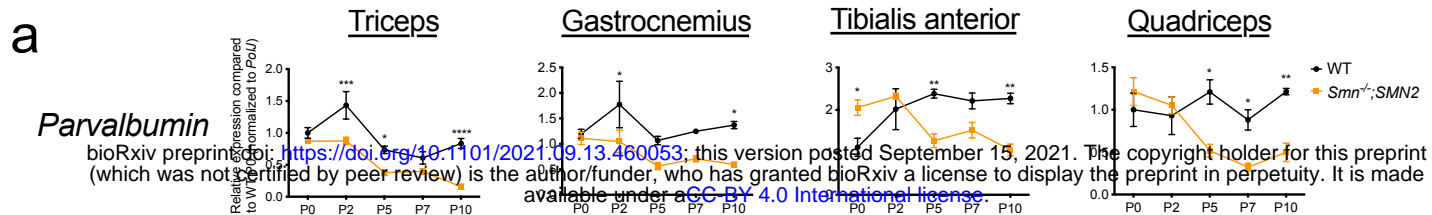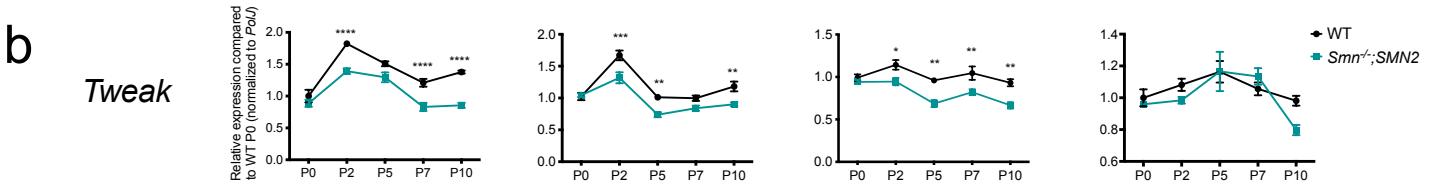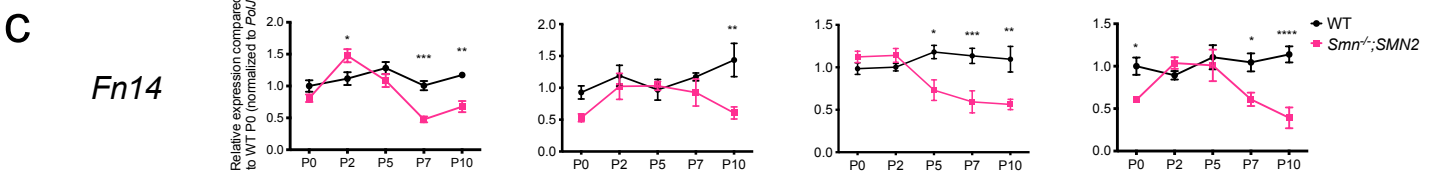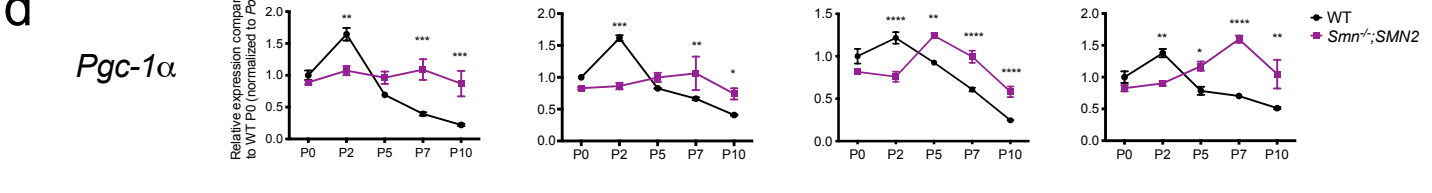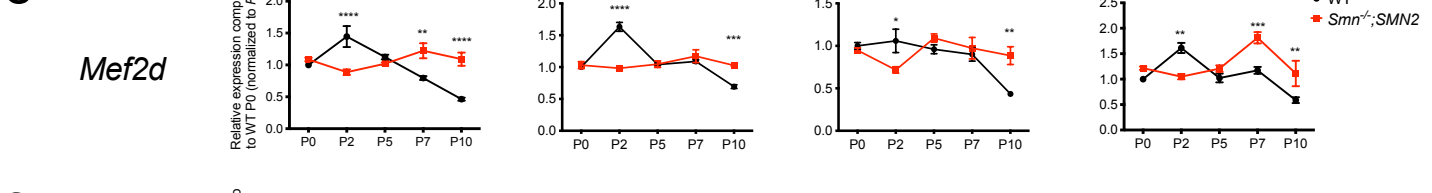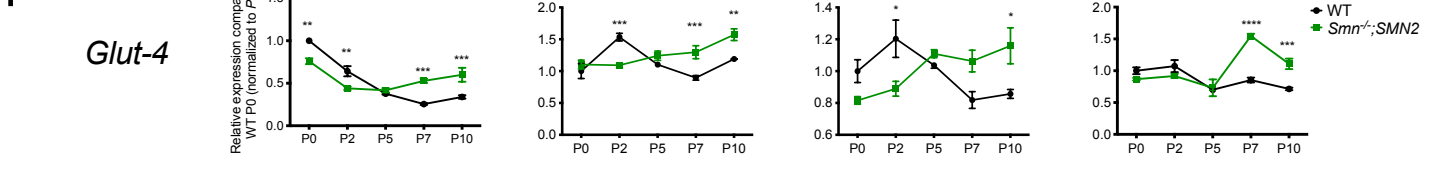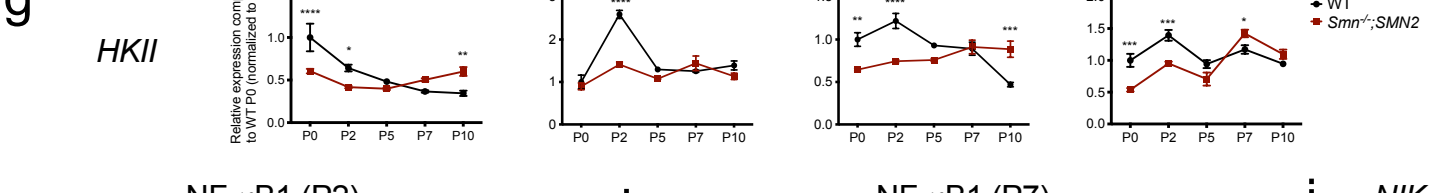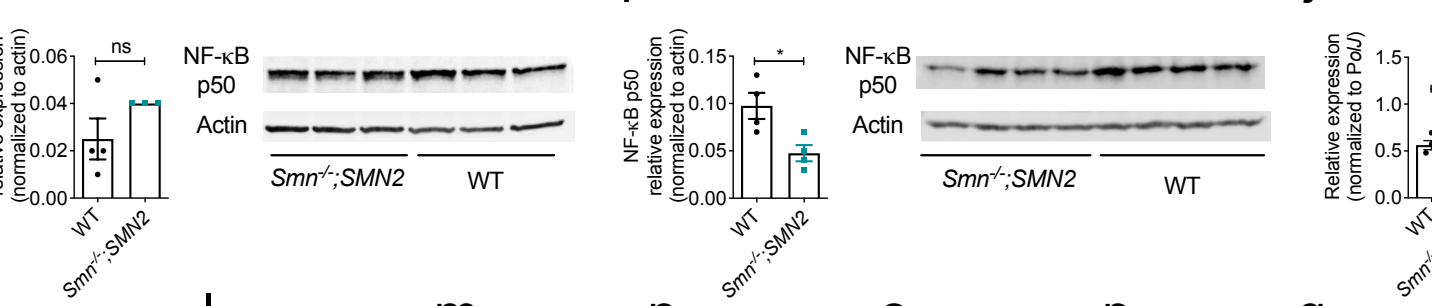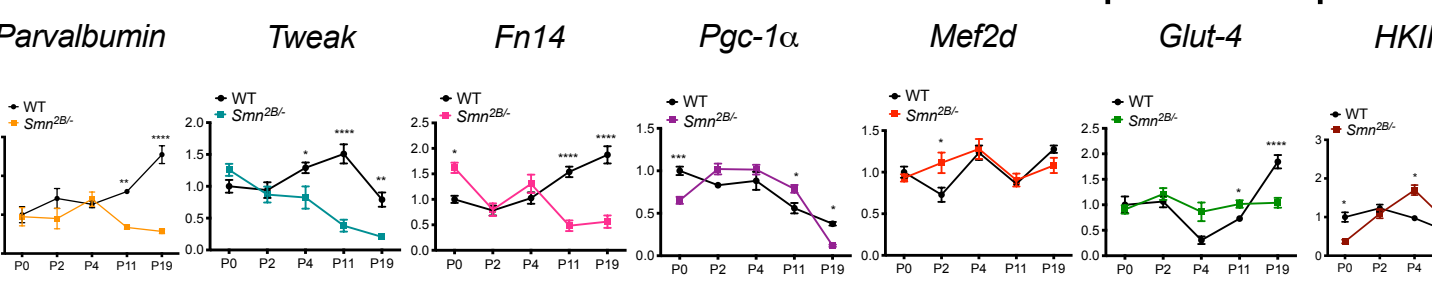

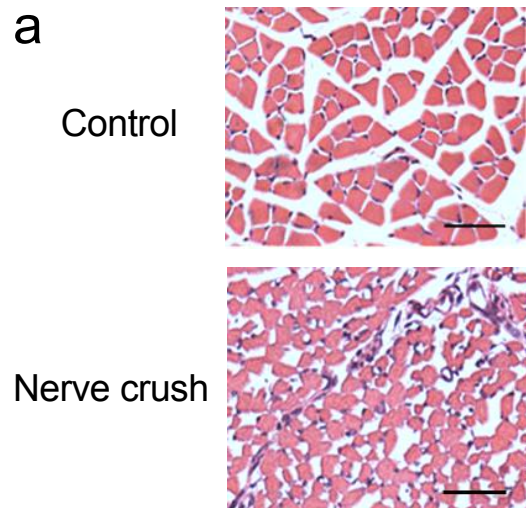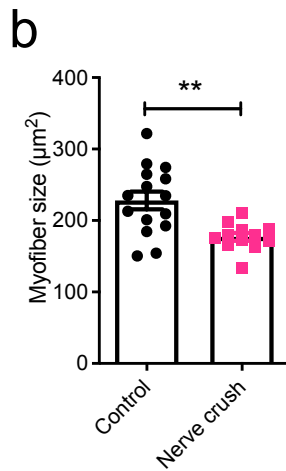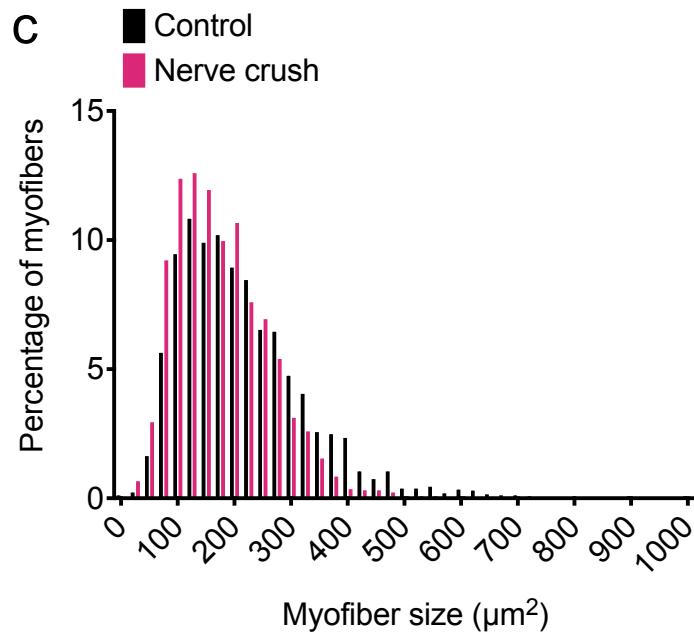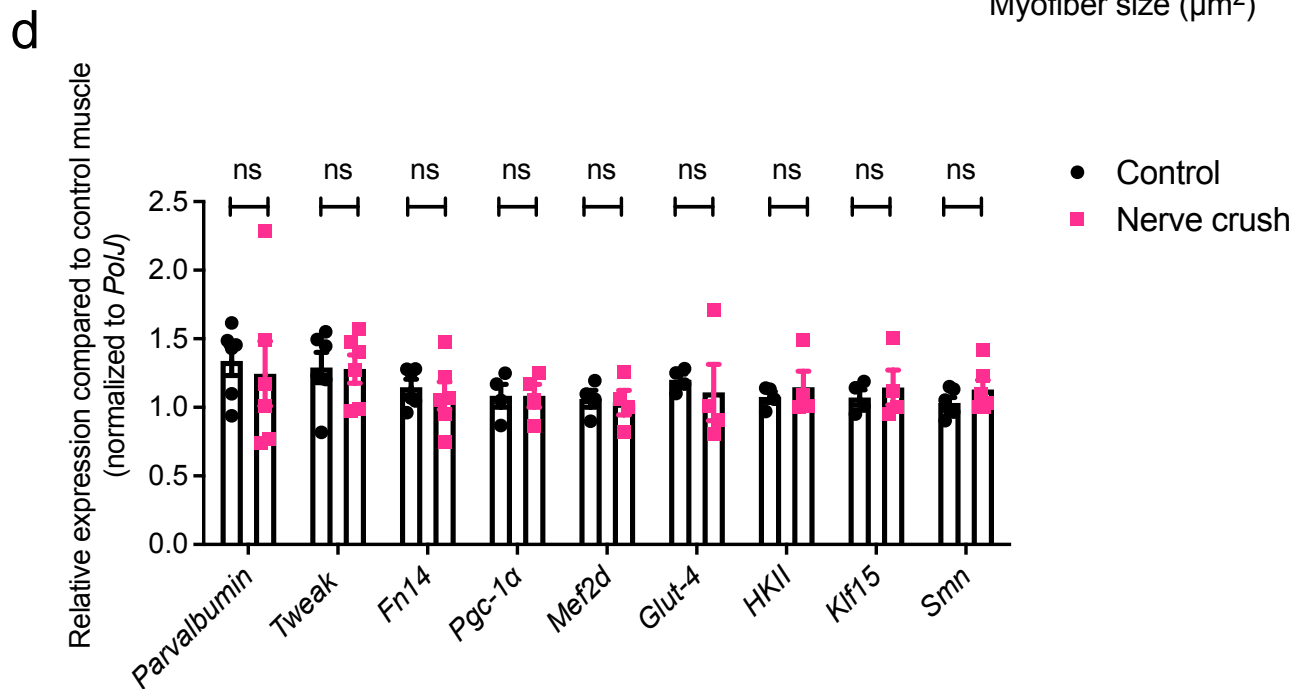

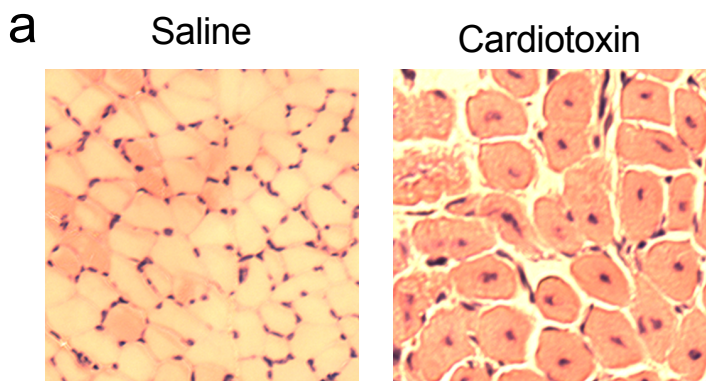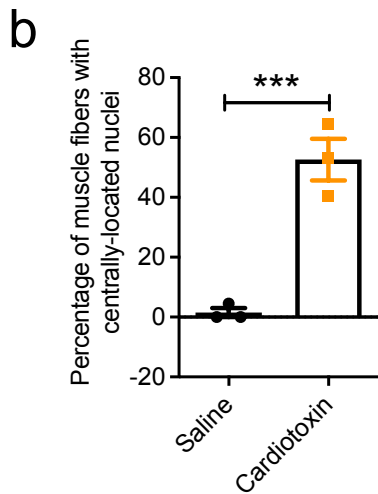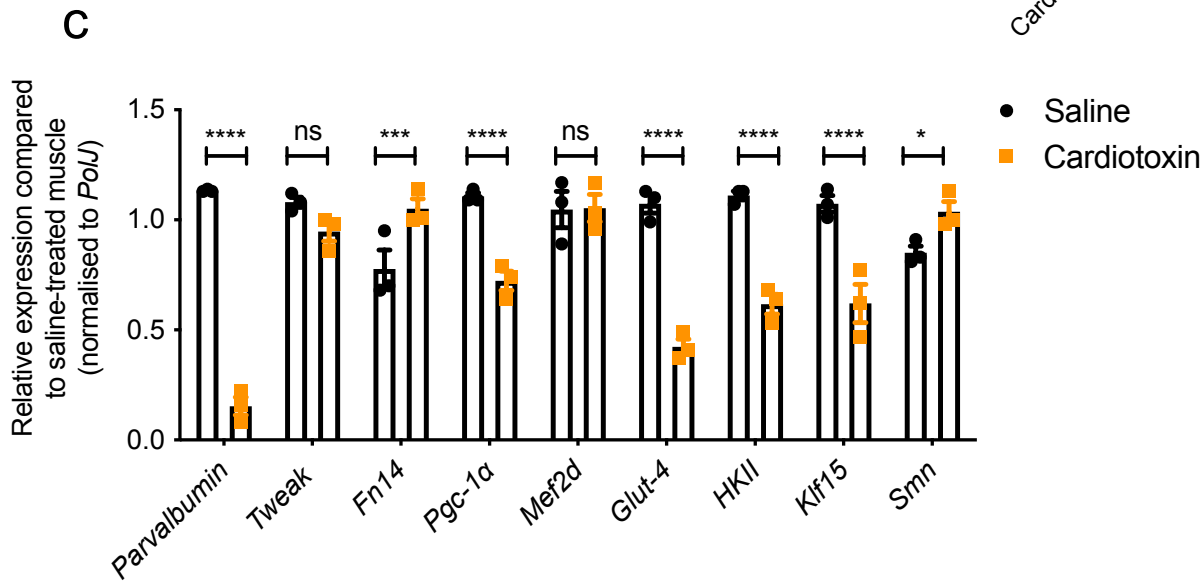

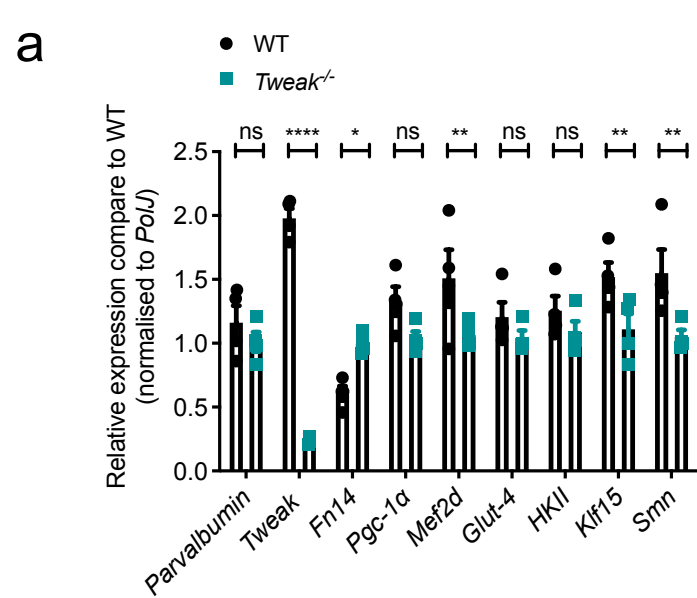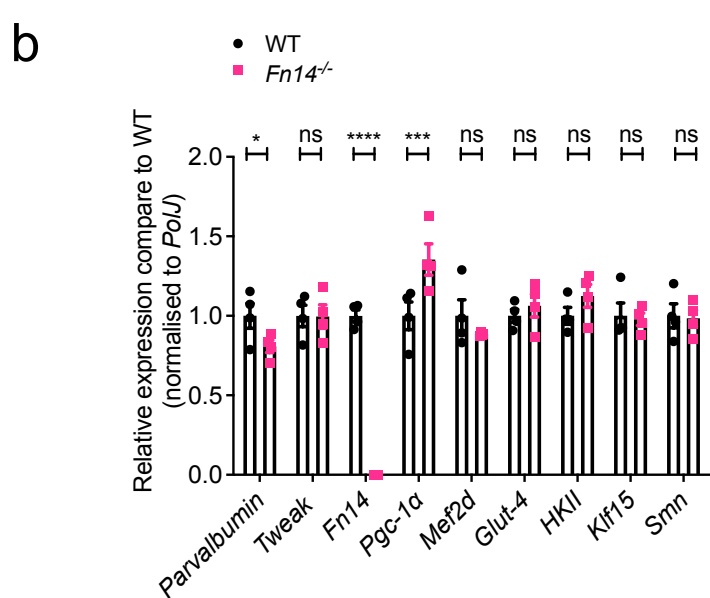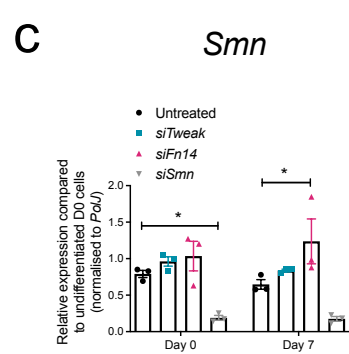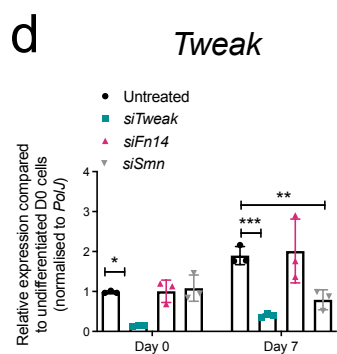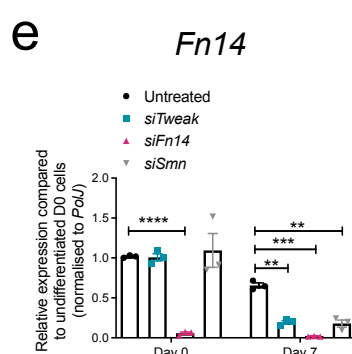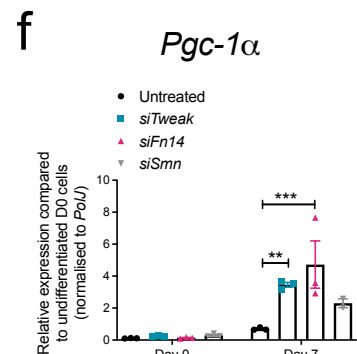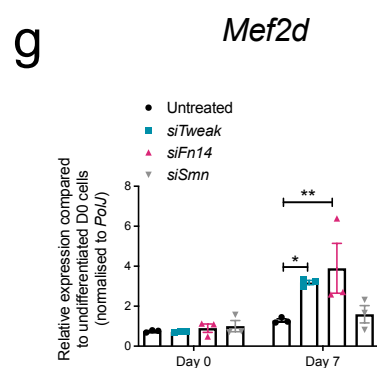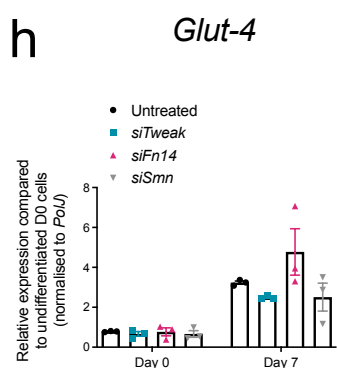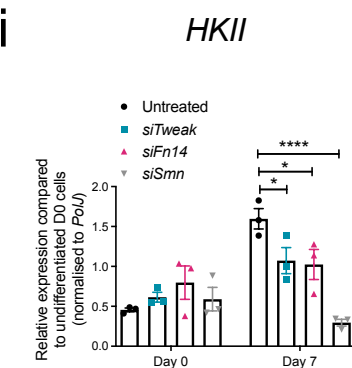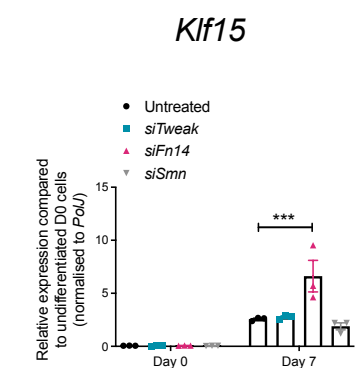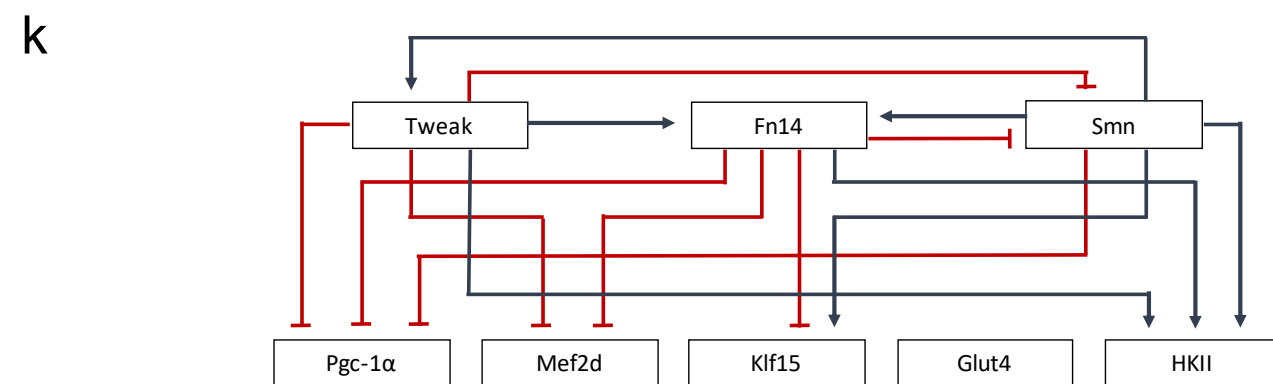

# a Myopathy and myogenesis

bioRxiv preprint doi: <https://doi.org/10.1101/2021.09.13.460053>; this version posted September 15, 2021. The copyright holder for this preprint (which was not certified by peer review) is the author/funder, who has granted bioRxiv a license to display the preprint in perpetuity. It is made available under aCC-BY 4.0 International license.

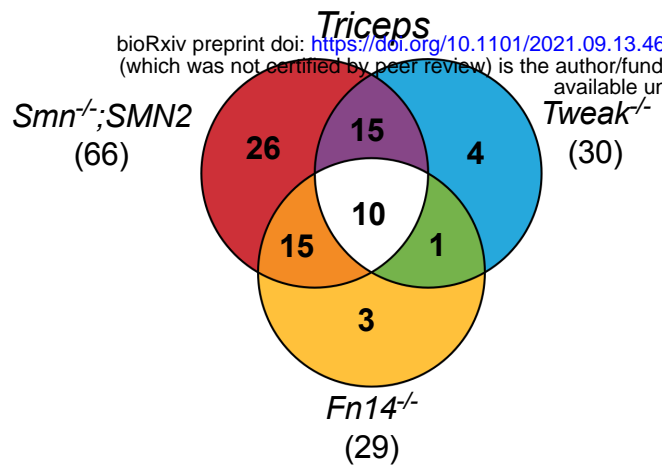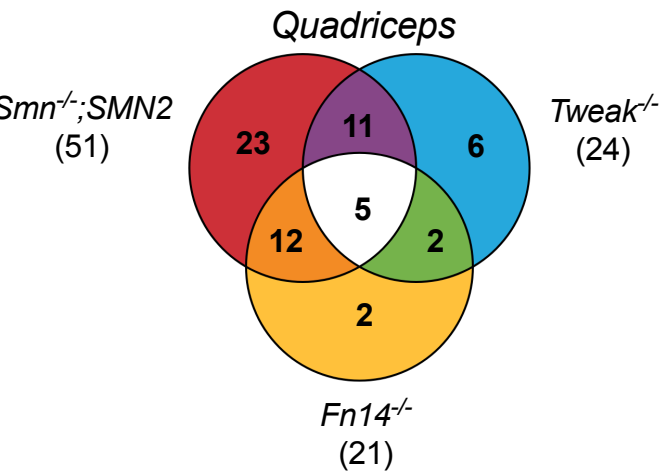

# c Glucose metabolism

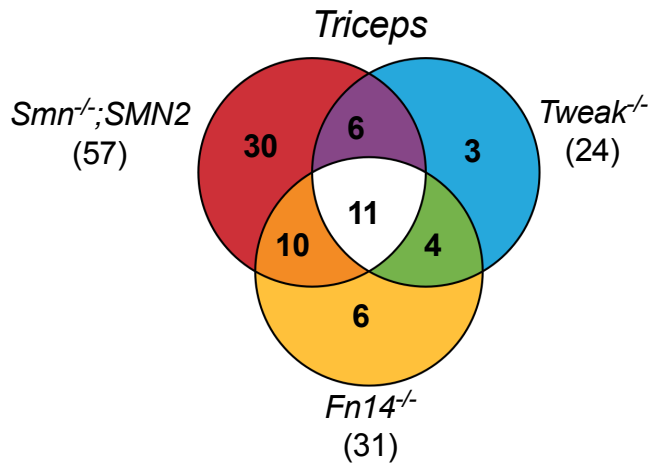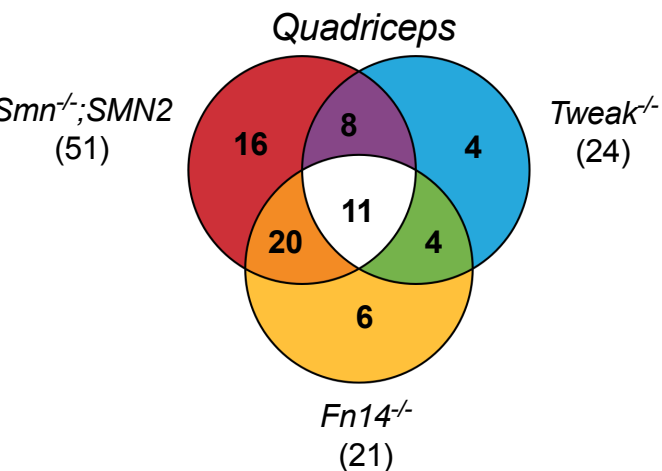

b

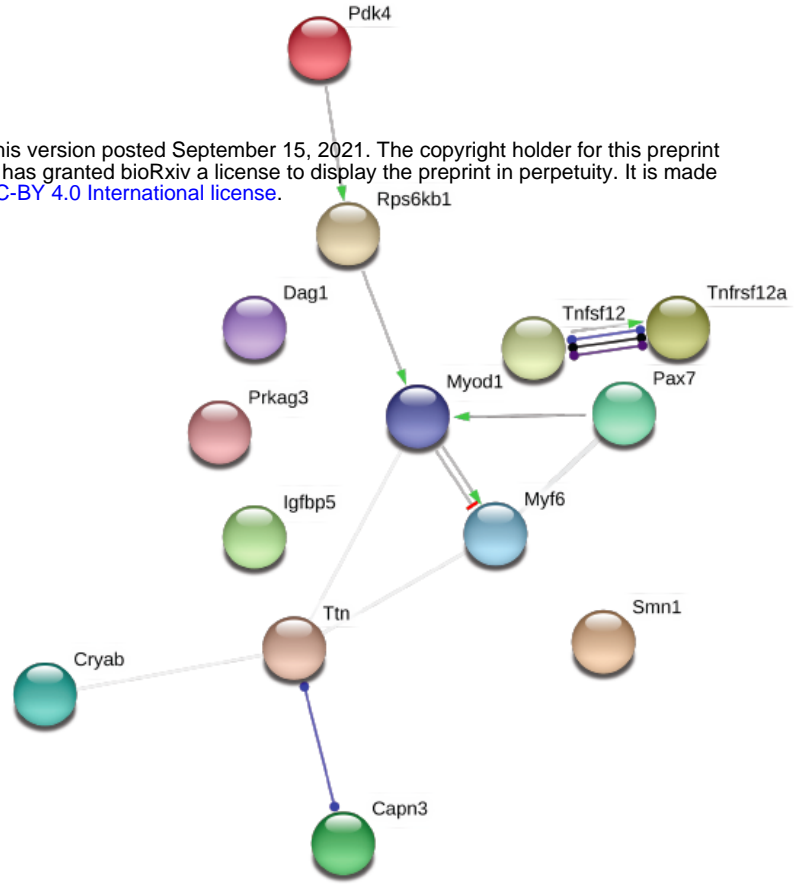

d

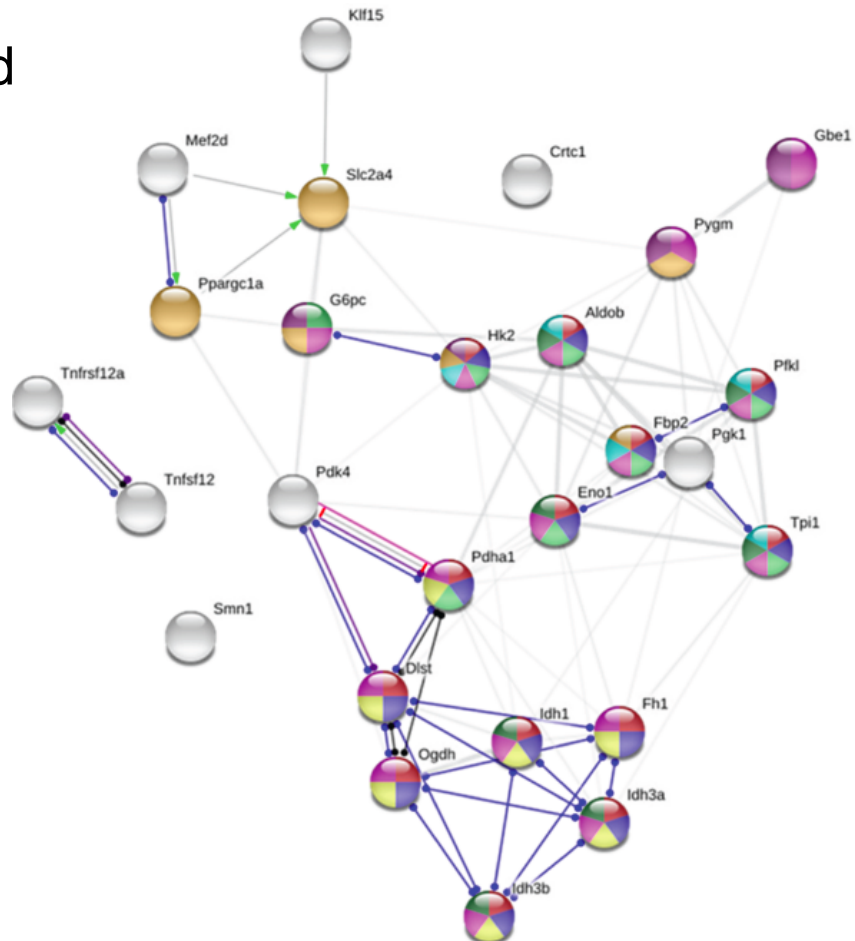

## Action types

- Activation
- Binding
- Phenotype
- Reaction
- Inhibition
- Catalysis
- Posttranslational modification
- Transcriptional regulation

## Action effects

- Positive
- Negative
- Unspecified

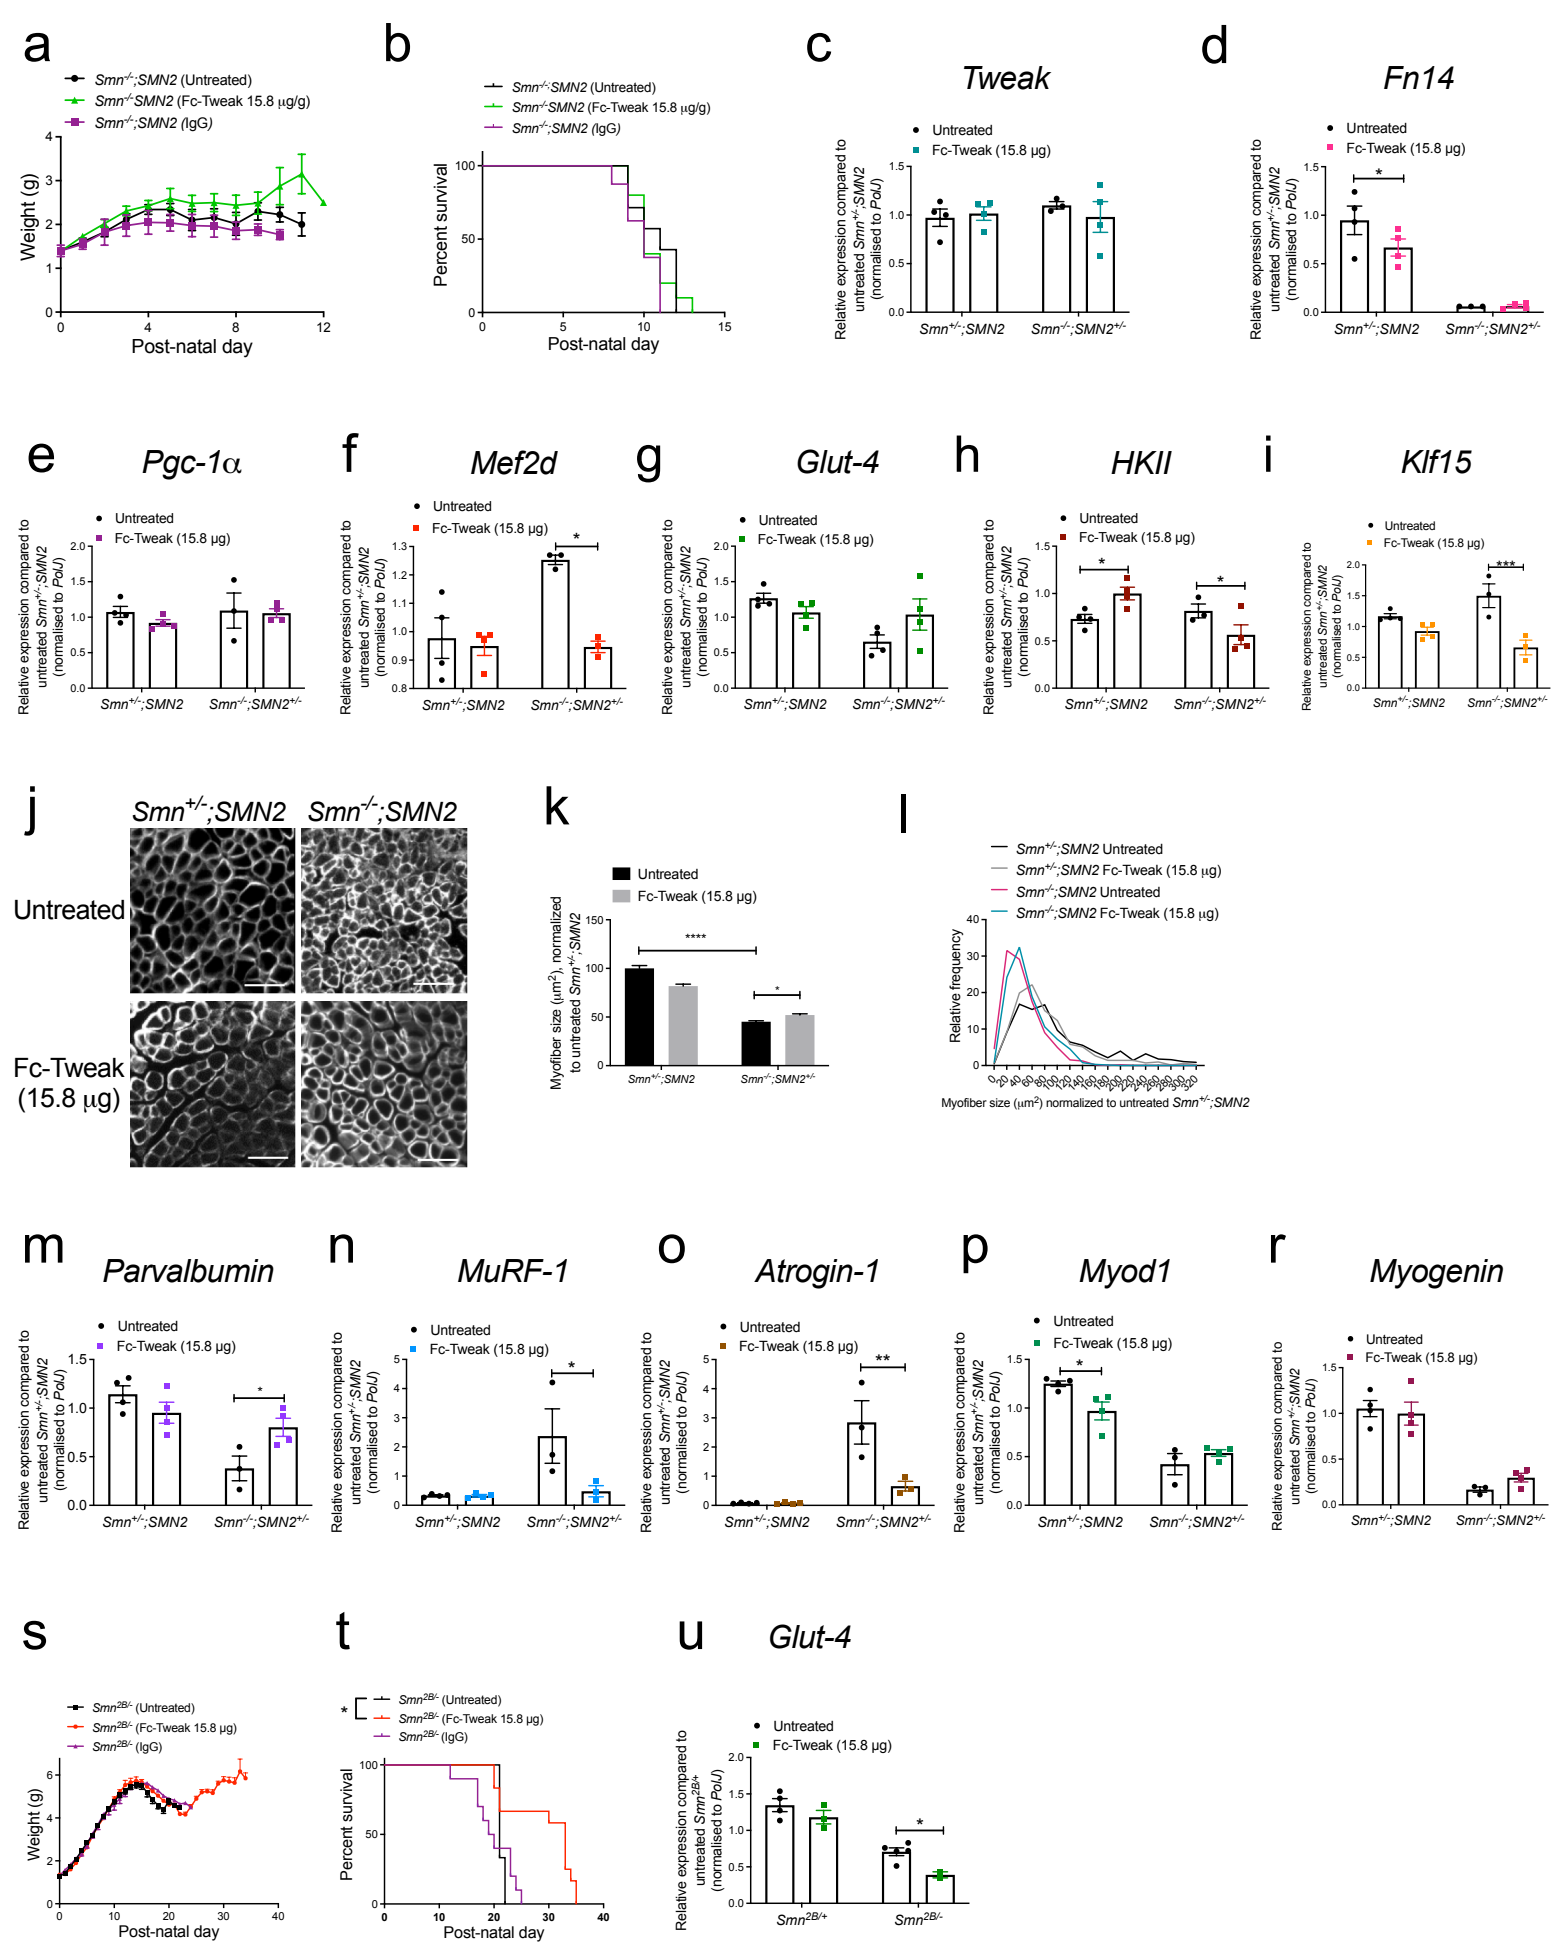



**Table 1. Myogenesis and myopathy genes significantly dysregulated in the same direction in triceps and quadriceps of P7 *Smn*<sup>-/-</sup>; *SMN2*, *Fn14*<sup>-/-</sup> and *Tweak*<sup>-/-</sup> mice when compared to P7 WT mice.**

| <b>Gene</b>                                                                | <b><i>Triceps</i></b> | <b><i>Quadriceps</i></b> |
|----------------------------------------------------------------------------|-----------------------|--------------------------|
| <i>Calpain3</i> (Capn3)                                                    | Up                    | Up                       |
| <i>Crystallin Alpha B</i> (Cryab)                                          | Up                    | —                        |
| <i>Dystroglycan 1</i> (Dag1)                                               | Down                  | Down                     |
| <i>Insulin Like Growth Factor Binding Protein 5</i> (Igfbp5)               | Down                  | —                        |
| <i>Myogenic Factor 6</i> (Myf6)                                            | Up                    | —                        |
| <i>Myogenic Differentiation 1</i> (Myod1)                                  | Up                    | —                        |
| <i>Paired Box 7</i> (Pax7)                                                 | Down                  | —                        |
| <i>Protein Kinase AMP-Activated Non-Catalytic Subunit Gamma 3</i> (Prkag3) | Down                  | Down                     |
| <i>Pyruvate Dehydrogenase Kinase 4</i> (Pdk4)                              | Up                    | —                        |
| <i>Ribosomal Protein S6 Kinase B1</i> (Rps6kb1)                            | Down                  | Down                     |
| <i>Titin</i> (Ttn)                                                         | —                     | Down                     |

**Table 2. Glucose metabolism genes significantly dysregulated in the same direction in triceps and quadriceps of P7 *Smn*<sup>-/-</sup>; *SMN2*, *Fn14*<sup>-/-</sup> and *Tweak*<sup>-/-</sup> mice when compared to P7 WT mice.**

| <b>Gene</b>                                                   | <b><i>Triceps</i></b> | <b><i>Quadriceps</i></b> |
|---------------------------------------------------------------|-----------------------|--------------------------|
| <i>Aldolase, Fructose-Bisphosphate B</i> (Aldob)              | Down                  | —                        |
| <i>1,4-Alpha-Glucan Branching Enzyme 1</i> (Gbe1)             | —                     | Down                     |
| <i>Dihydrolipoamide S-Succinyltransferase</i> (Dlst)          | Down                  | Down                     |
| <i>Enolase 1</i> (Eno1)                                       | Down                  | Down                     |
| <i>Filamin B</i> (Fh1)                                        | Down                  | —                        |
| <i>Fructose-Bisphosphatase 2</i> (Fbp2)                       | Up                    | —                        |
| <i>Glucose-6-Phosphatase Catalytic Subunit</i> (G6pc)         | Down                  | —                        |
| <i>Glycogen Phosphorylase Muscle Associated</i> (Pygm)        | —                     | Down                     |
| <i>Isocitrate Dehydrogenase (NADP(+)) 1, Cytosolic</i> (Idh1) | Down                  | —                        |
| <i>Isocitrate Dehydrogenase 3 (NAD(+)) Alpha</i> (Idh3a)      | Down                  | Down                     |
| <i>Isocitrate Dehydrogenase 3 (NAD(+)) Beta</i> (Idh3b)       | —                     | Down                     |
| <i>Oxoglutarate Dehydrogenase</i> (Ogdh)                      | Down                  | Down                     |
| <i>Phosphofructokinase, Liver Type</i> (Pfk1)                 | —                     | Down                     |
| <i>Pyruvate Dehydrogenase E1 Alpha 1 Subunit</i> (Pdha1)      | —                     | Down                     |
| <i>Pyruvate Dehydrogenase Kinase 4</i> (Pdk4)                 | Up                    | Up                       |
| <i>Phosphoglycerate Kinase 1</i> (Pgk1)                       | Down                  | —                        |
| <i>Triosephosphate Isomerase 1</i> (Tpi1)                     | —                     | Down                     |

**Table 3. KEGG pathways generated from glucose metabolism genes that were significantly dysregulated in the same direction in triceps and quadriceps of P7 *Smn<sup>-/-</sup>;SMN2, Fn14<sup>-/-</sup>* and *Tweak<sup>-/-</sup>* mice when compared to P7 WT mice.**

| Pathway ID | Pathway description                                                                                                            | Count in gene set | False discovery rate (FDR) |
|------------|--------------------------------------------------------------------------------------------------------------------------------|-------------------|----------------------------|
| 01200      |  Carbon metabolism                            | 13                | 7.62e-22                   |
| 01120      |  Microbial metabolism in diverse environments | 13                | 1.87e-19                   |
| 00010      |  Glycolysis/Gluconeogenesis                   | 8                 | 2.09e-13                   |
| 00020      |  Citrate cycle (TCA cycle)                    | 7                 | 2.09e-13                   |
| 01100      |  Metabolic pathways                           | 16                | 7.65e-13                   |
| 01230      |  Biosynthesis of amino acids                  | 7                 | 8.75e-11                   |
| 00051      |  Fructose and mannose metabolism              | 5                 | 1.7e-08                    |
| 04910      |  Insulin signaling pathway                  | 6                 | 3.09e-07                   |
| 00500      |  Starch and sucrose metabolism              | 4                 | 8.58e-06                   |
| 04152      | AMPK signaling pathway                                                                                                         | 5                 | 8.58e-06                   |
| 01210      | 2-Oxocarboxylic acid metabolism                                                                                                | 3                 | 2.79e-05                   |
| 00030      | Pentose phosphate pathway                                                                                                      | 3                 | 0.000126                   |
| 04066      | HIF-1 signaling pathway                                                                                                        | 4                 | 0.000141                   |
| 00052      | Galactose metabolism                                                                                                           | 3                 | 0.000145                   |
| 04920      | Adipocytokine signaling pathway                                                                                                | 3                 | 0.00138                    |
| 00620      | Pyruvate metabolism                                                                                                            | 2                 | 0.0177                     |
| 04973      | Carbohydrate digestion and absorption                                                                                          | 2                 | 0.0177                     |
| 04930      | Type II diabetes mellitus                                                                                                      | 2                 | 0.0227                     |
| 00310      | Lysine degradation                                                                                                             | 2                 | 0.0233                     |
